# Supplementary figures and images for: Geometries and segregation properties of platinum–palladium nanoalloy clusters
Source: Royal Society of Chemistry journal article supplement (doi:10.1039/b207847c), 2002-01-01

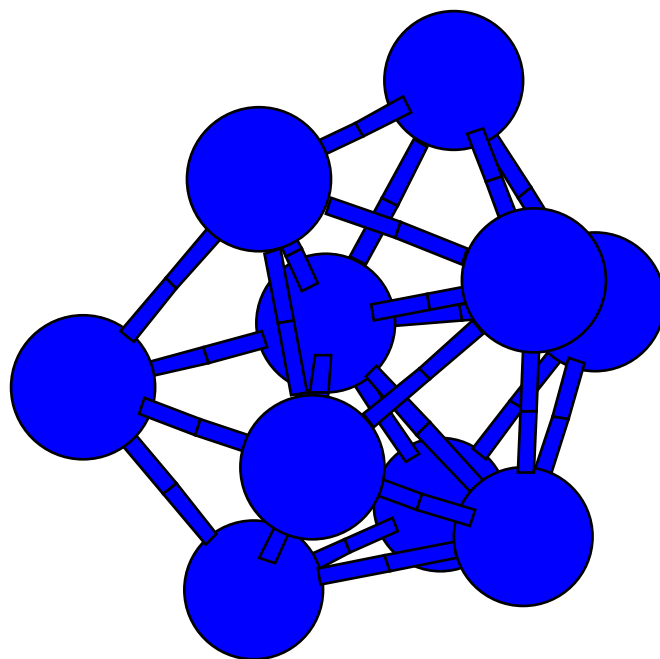

Supplement: pd10.pdf [file pd10.pdf]

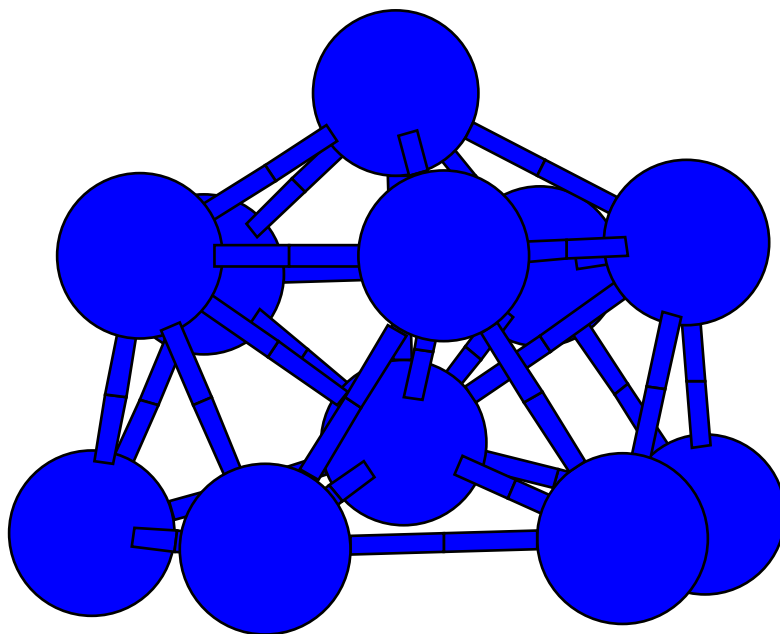

Supplement: pd11.pdf [file pd11.pdf]

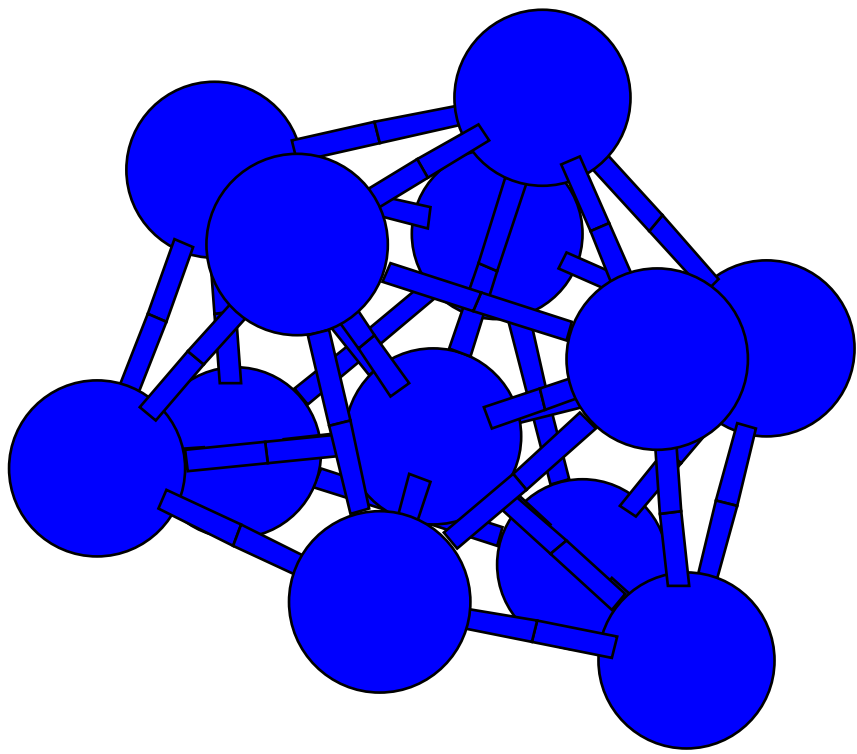

Supplement: pd12.pdf [file pd12.pdf]

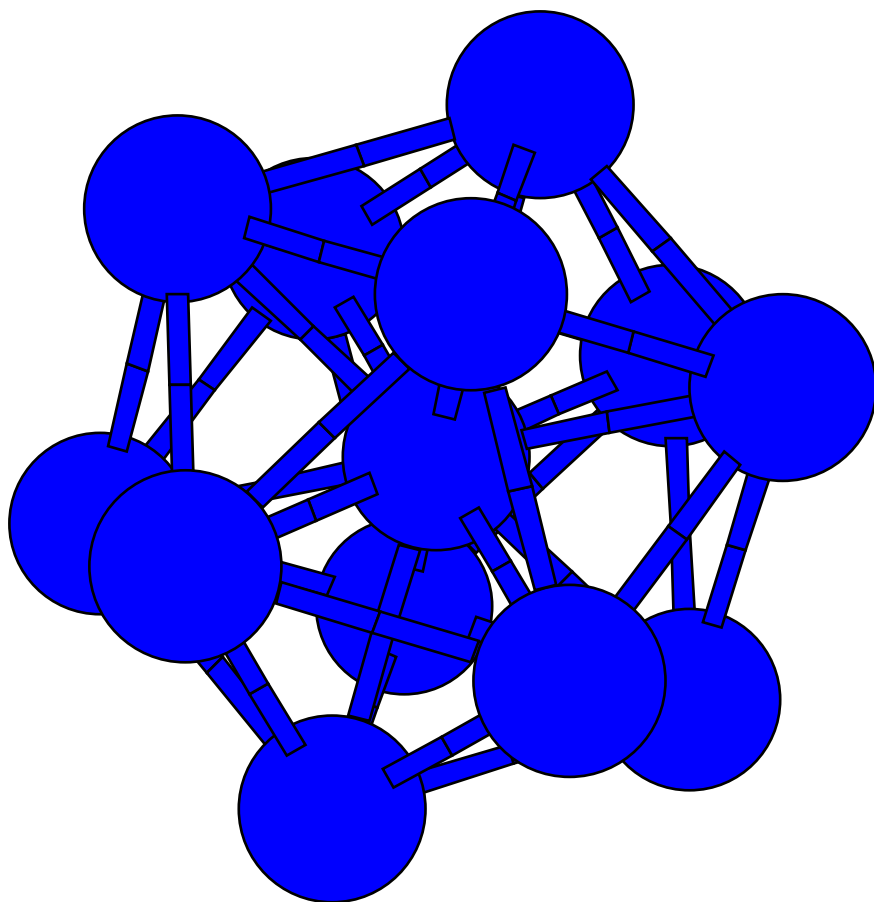

Supplement: pd13.pdf [file pd13.pdf]

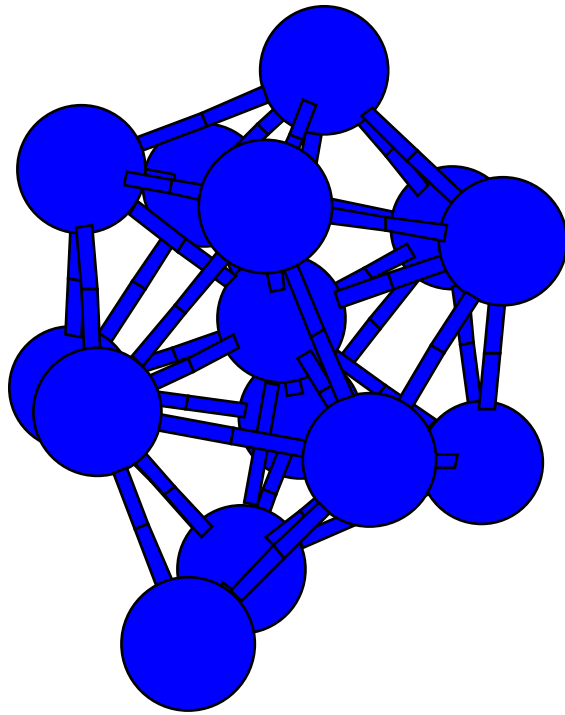

Supplement: pd14.pdf [file pd14.pdf]

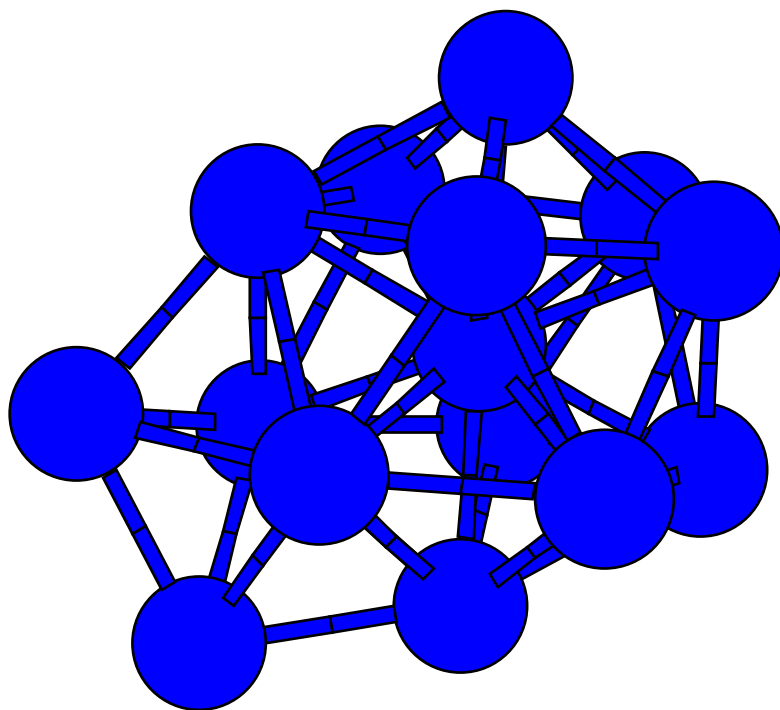

Supplement: pd15.pdf [file pd15.pdf]

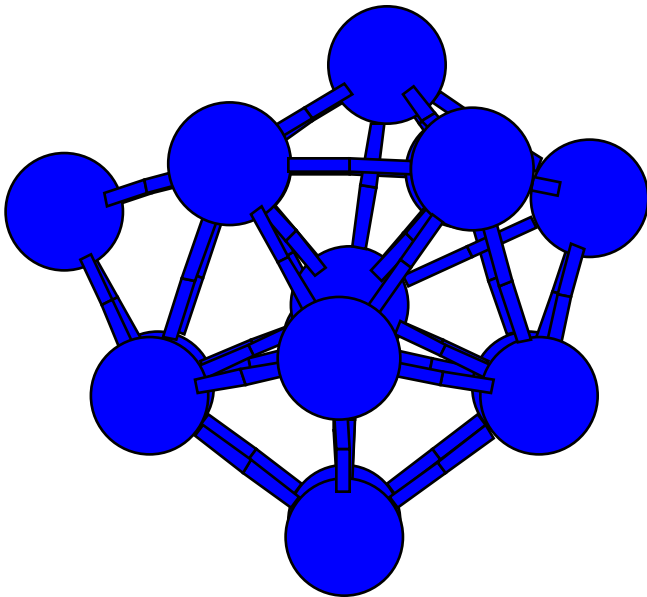

Supplement: pd16.pdf [file pd16.pdf]

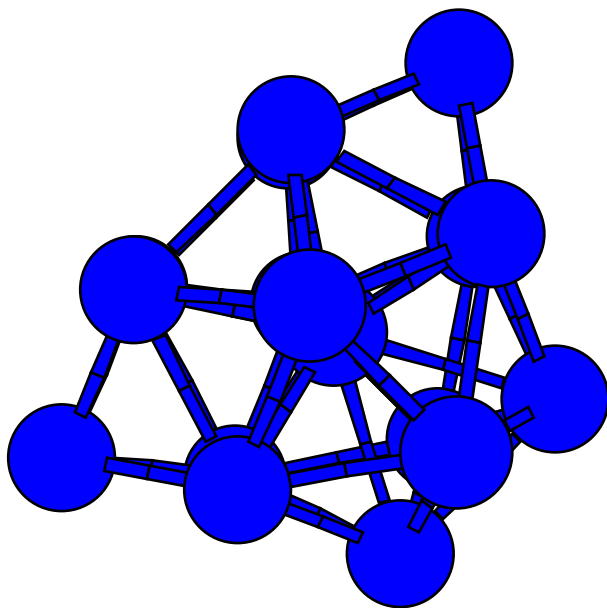

Supplement: pd17.pdf [file pd17.pdf]

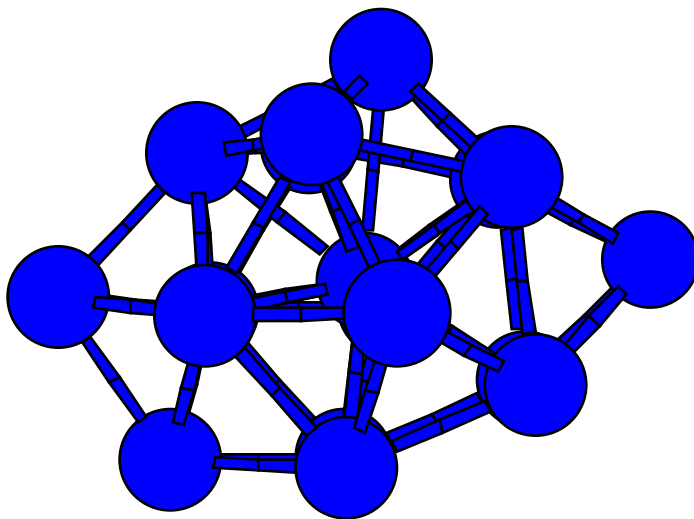

Supplement: pd18.pdf [file pd18.pdf]

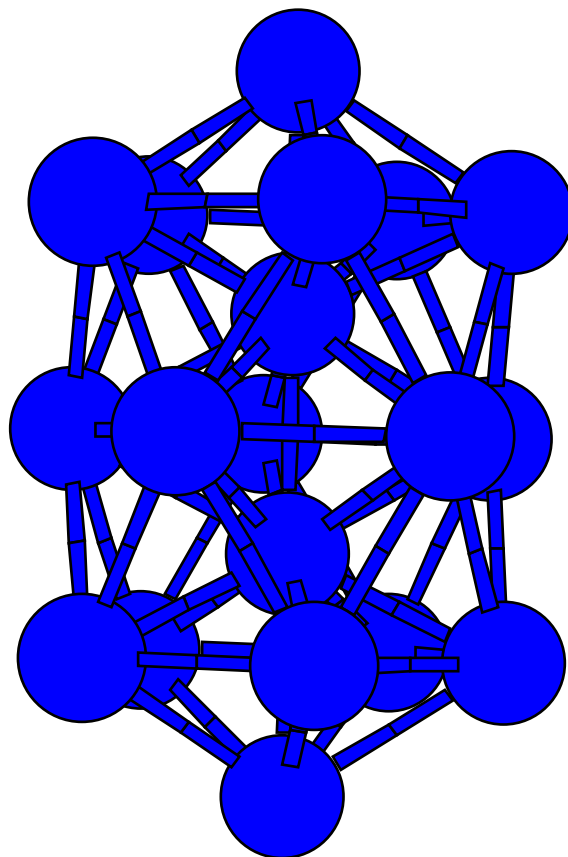

Supplement: pd19.pdf [file pd19.pdf]

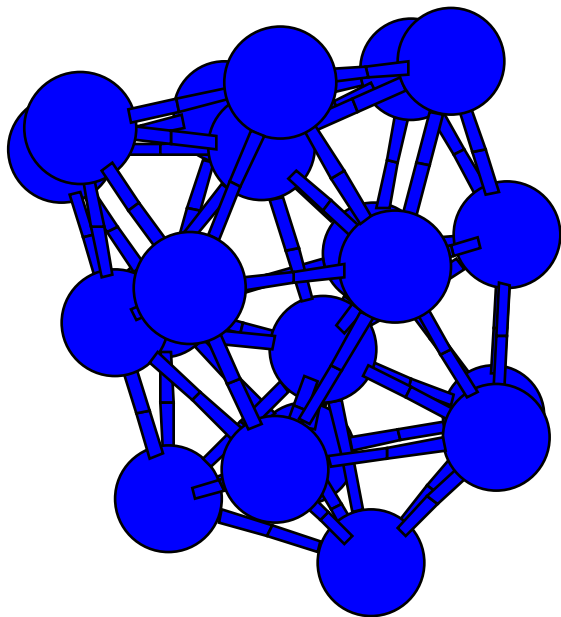

Supplement: pd20.pdf [file pd20.pdf]

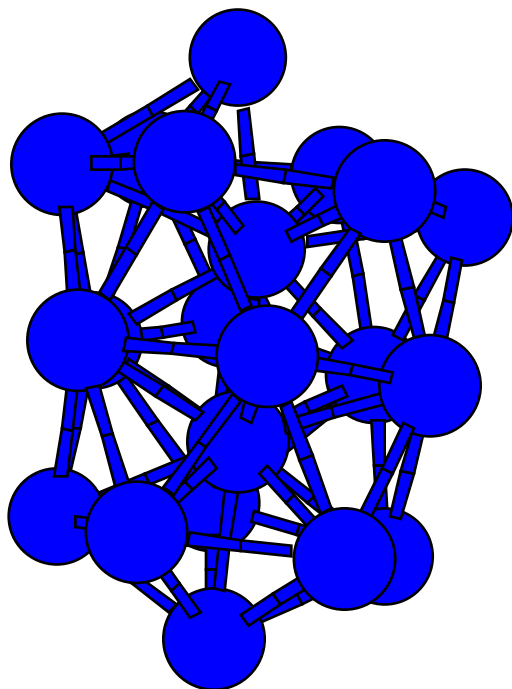

Supplement: pd21.pdf [file pd21.pdf]

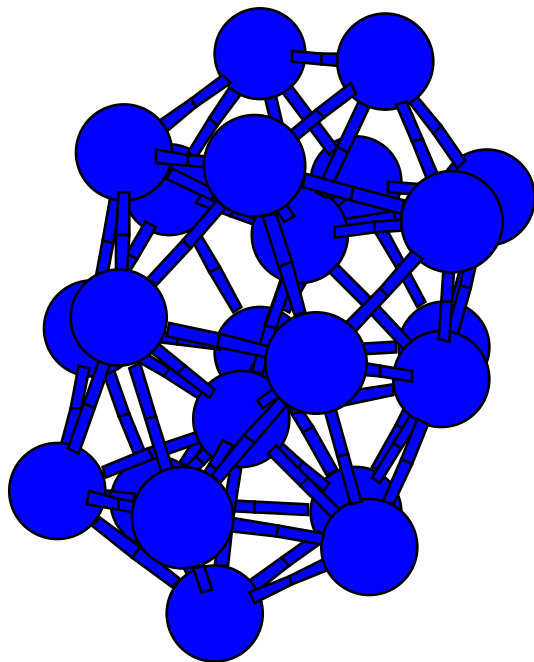

Supplement: pd22.pdf [file pd22.pdf]

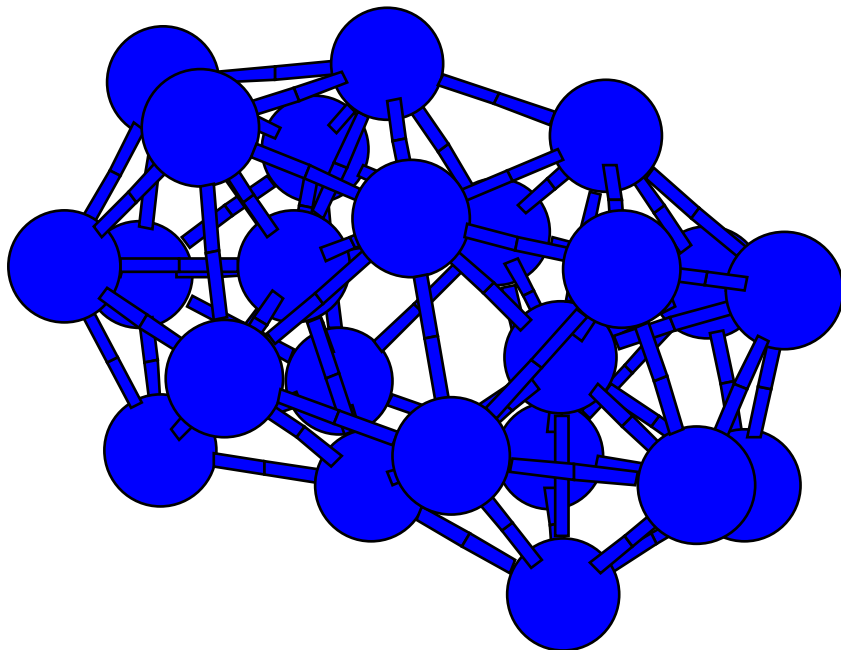

Supplement: pd23.pdf [file pd23.pdf]

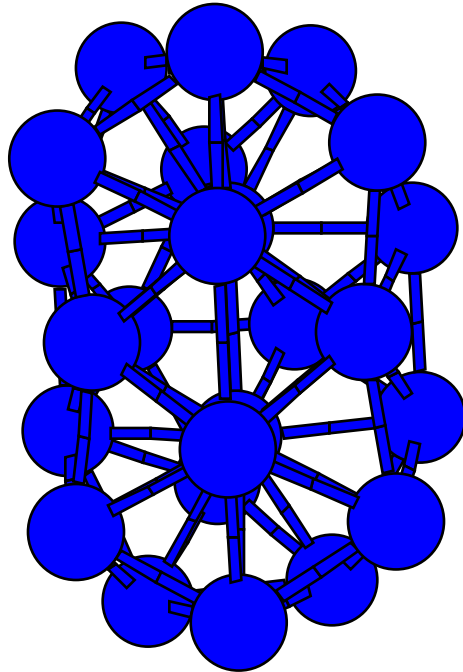

Supplement: pd24.pdf [file pd24.pdf]

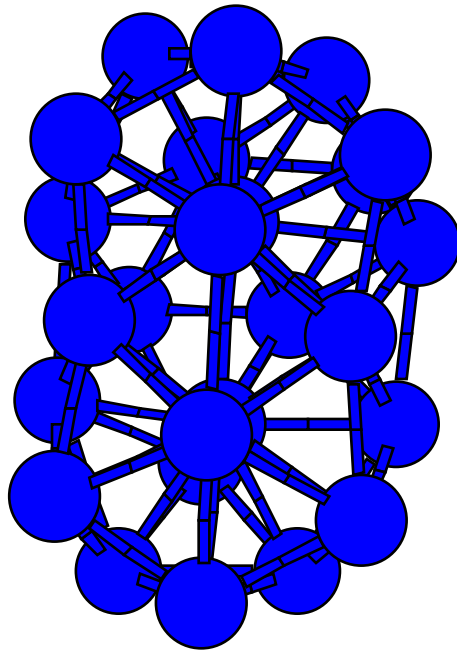

Supplement: pd25.pdf [file pd25.pdf]

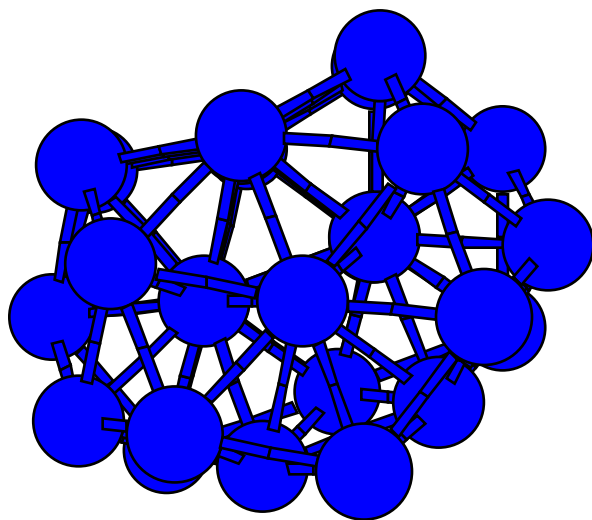

Supplement: pd26.pdf [file pd26.pdf]

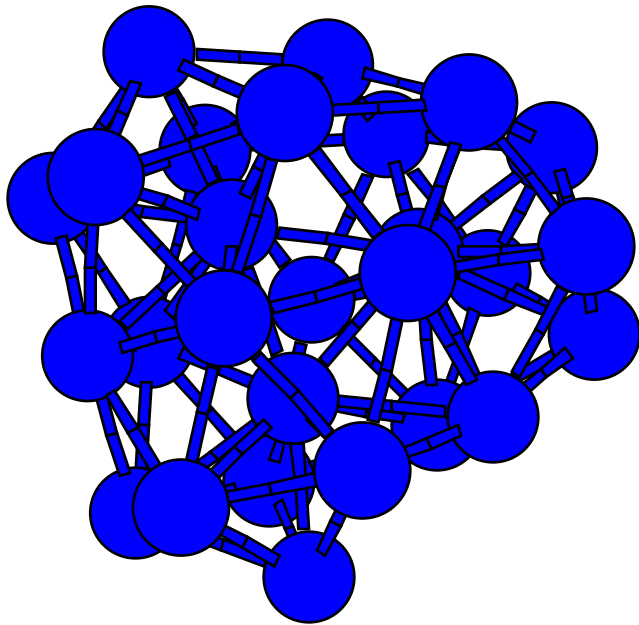

Supplement: pd27.pdf [file pd27.pdf]

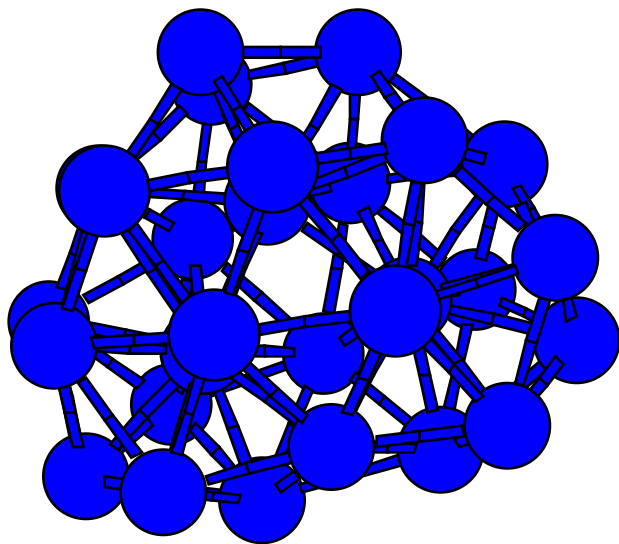

Supplement: pd28.pdf [file pd28.pdf]

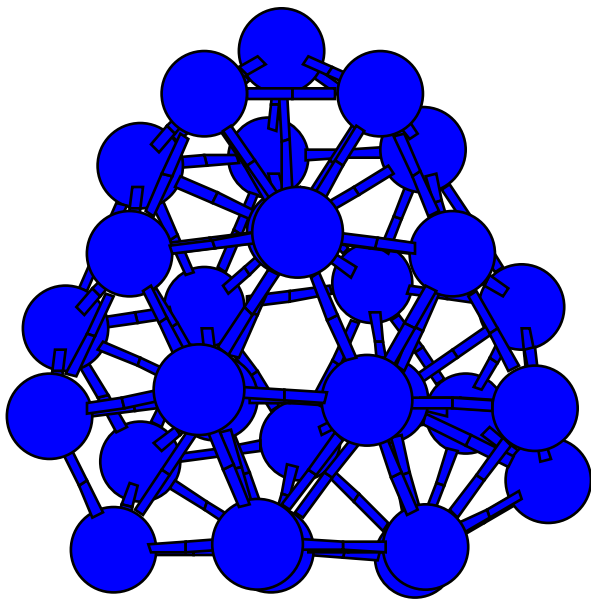

Supplement: pd29.pdf [file pd29.pdf]

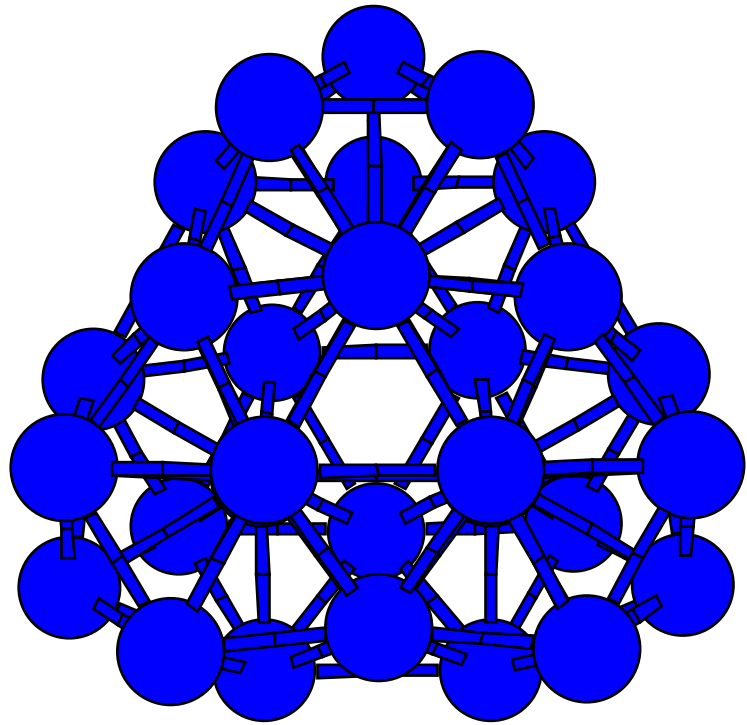

Supplement: pd30.pdf [file pd30.pdf]

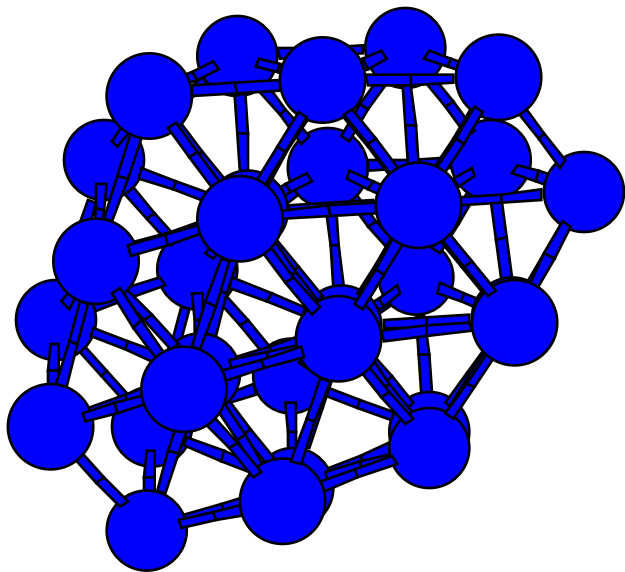

Supplement: pd31.pdf [file pd31.pdf]

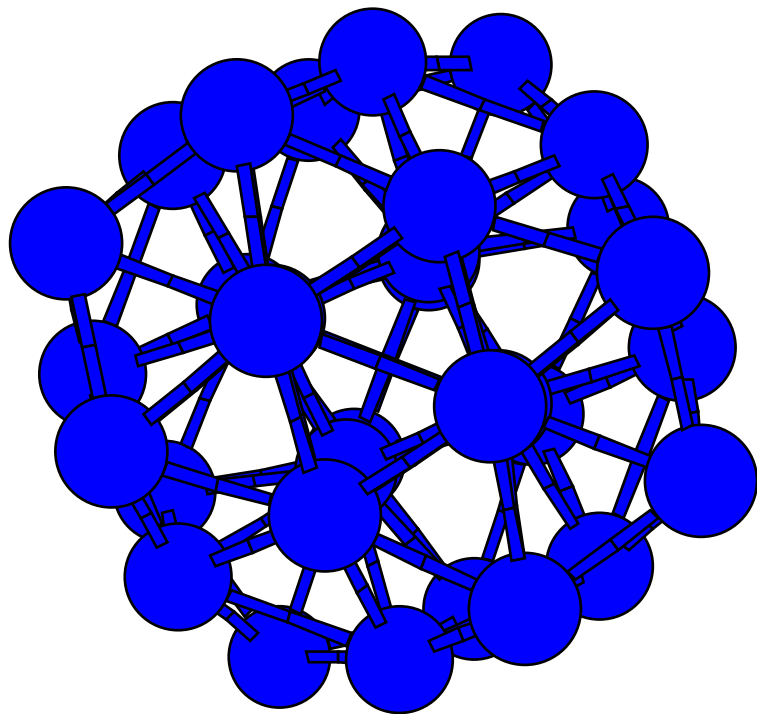

Supplement: pd32.pdf [file pd32.pdf]

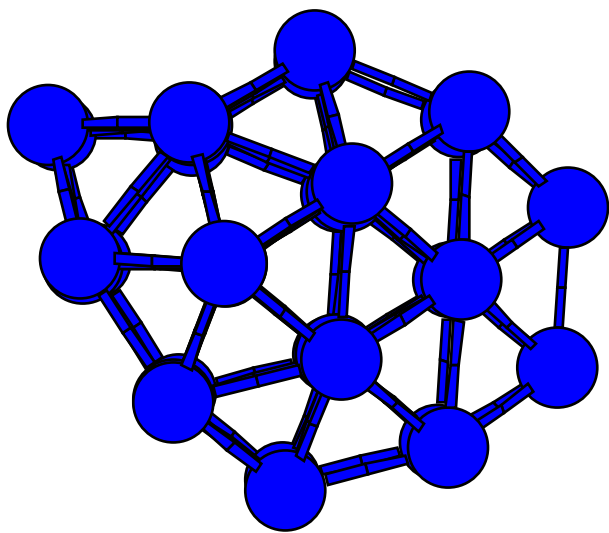

Supplement: pd33.pdf [file pd33.pdf]

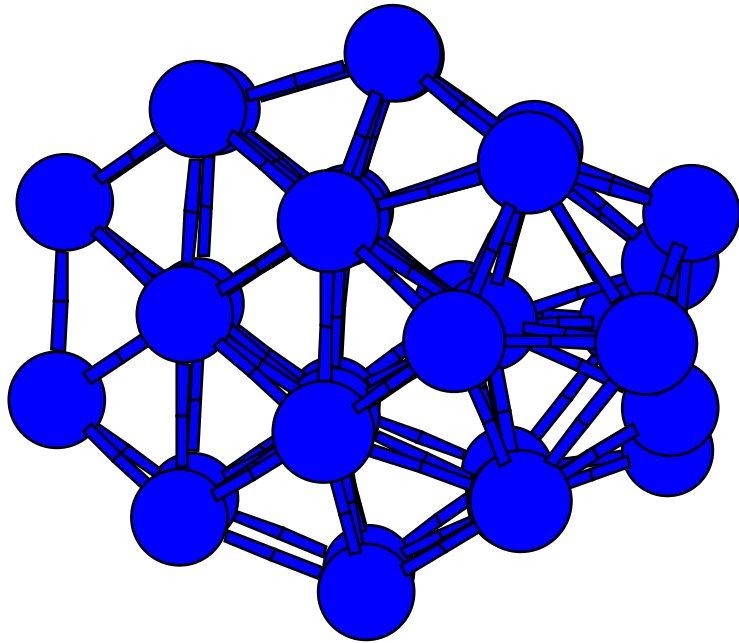

Supplement: pd34.pdf [file pd34.pdf]

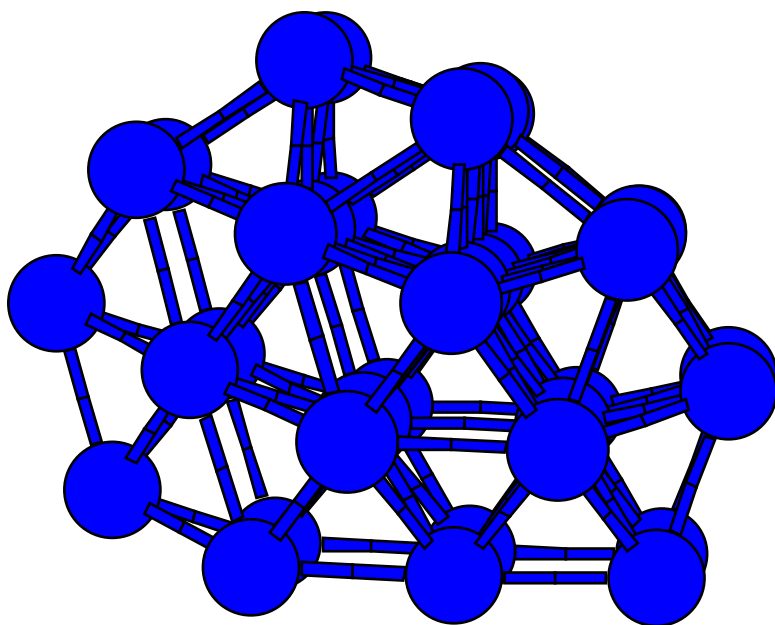

Supplement: pd35.pdf [file pd35.pdf]

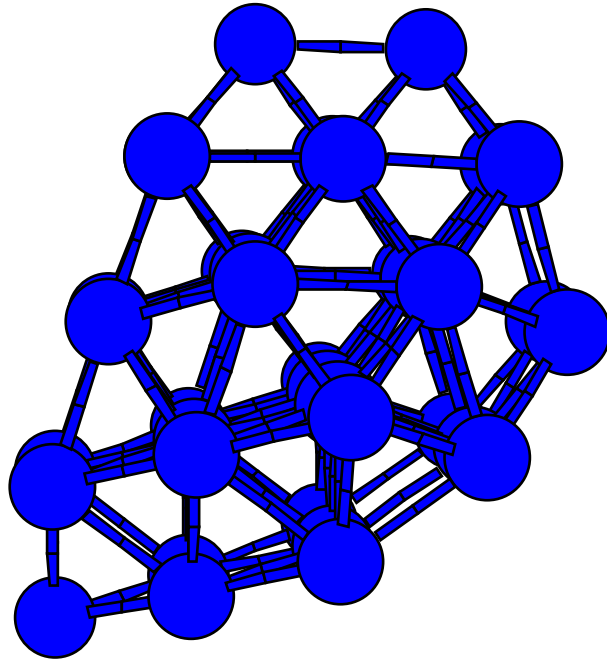

Supplement: pd36.pdf [file pd36.pdf]

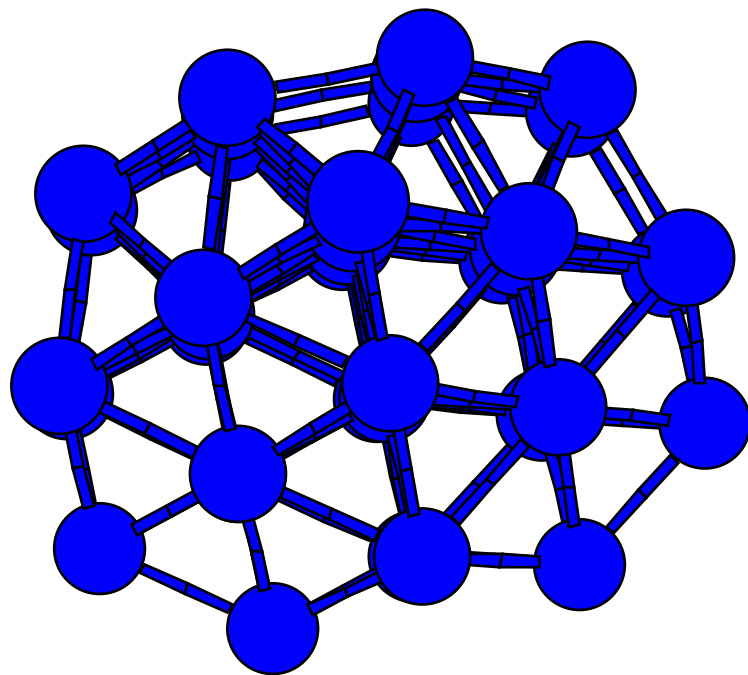

Supplement: pd37.pdf [file pd37.pdf]

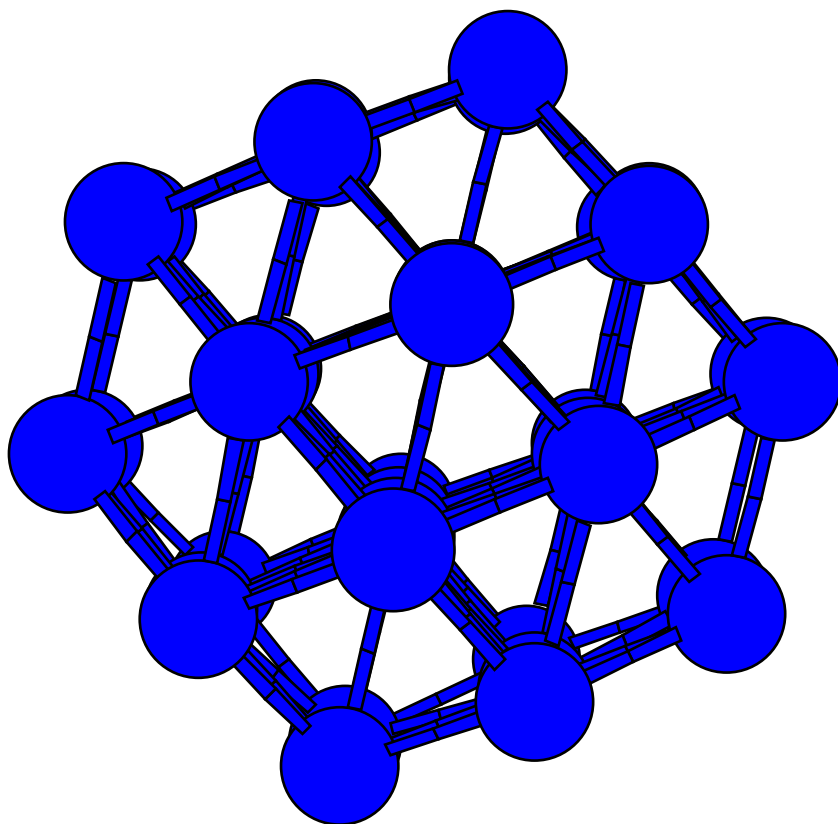

Supplement: pd38.pdf [file pd38.pdf]

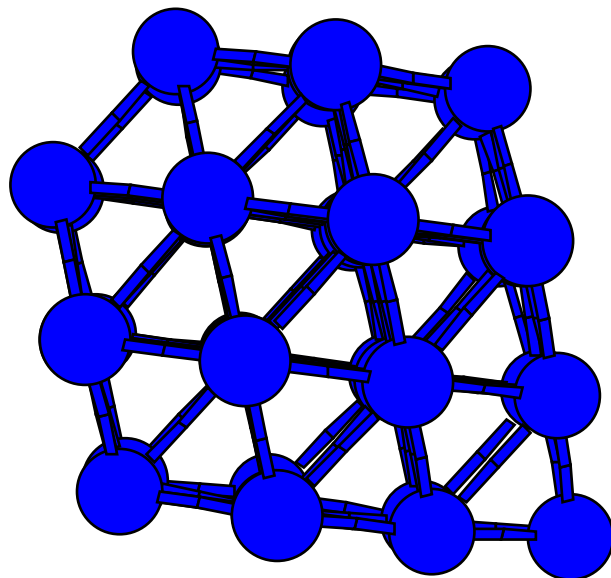

Supplement: pd39.pdf [file pd39.pdf]

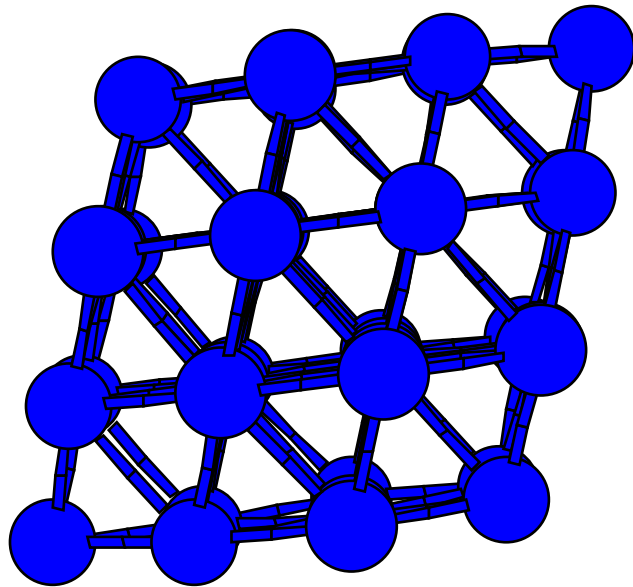

Supplement: pd40.pdf [file pd40.pdf]

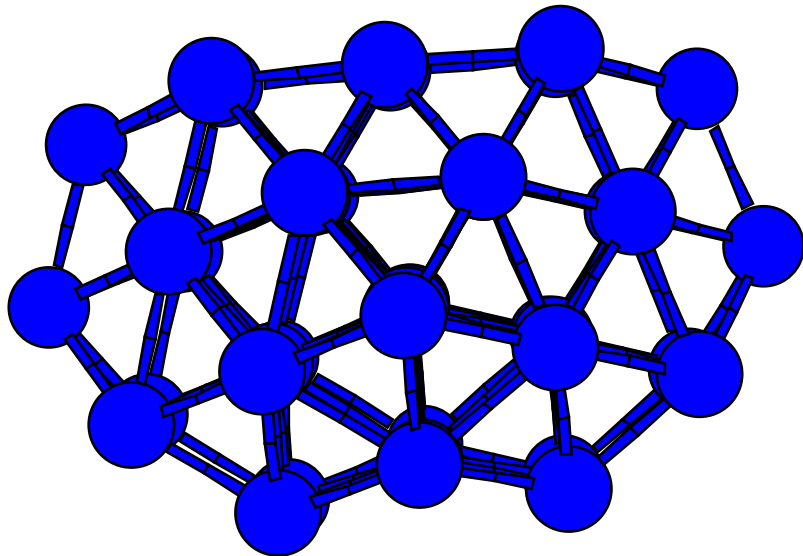

Supplement: pd41.pdf [file pd41.pdf]

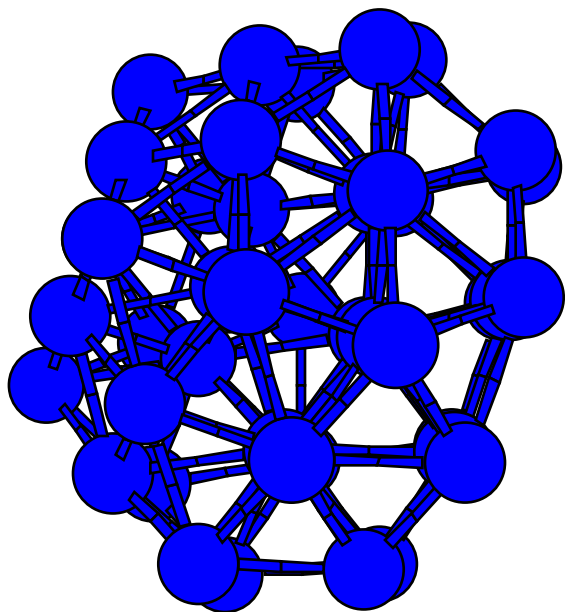

Supplement: pd42.pdf [file pd42.pdf]

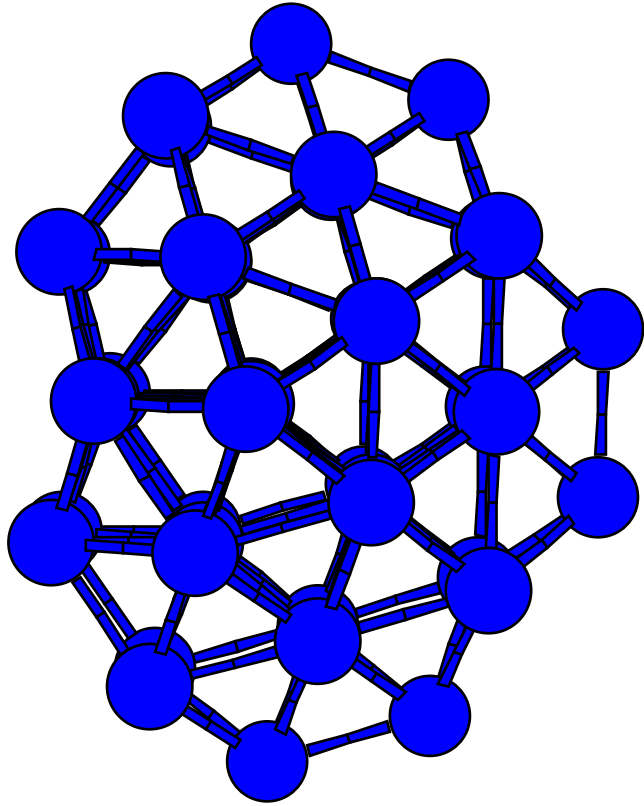

Supplement: pd43.pdf [file pd43.pdf]

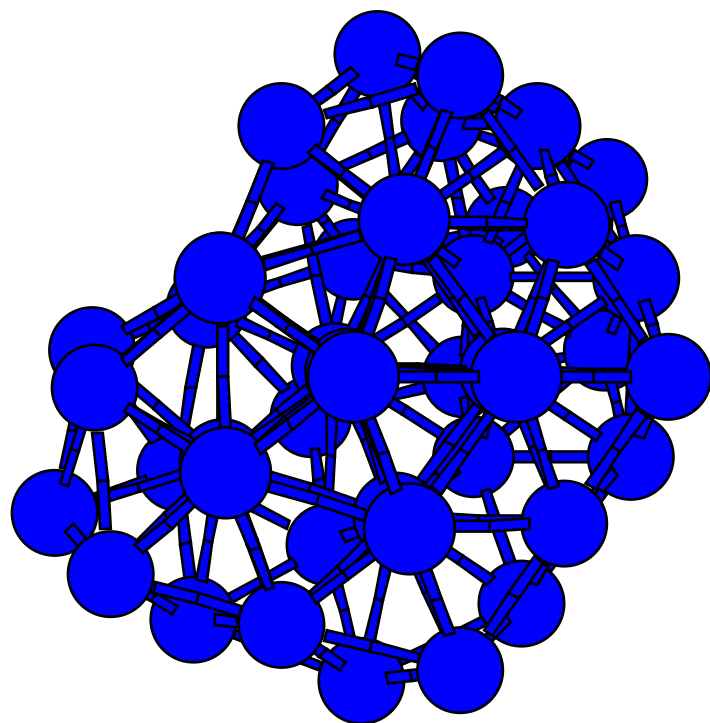

Supplement: pd44.pdf [file pd44.pdf]

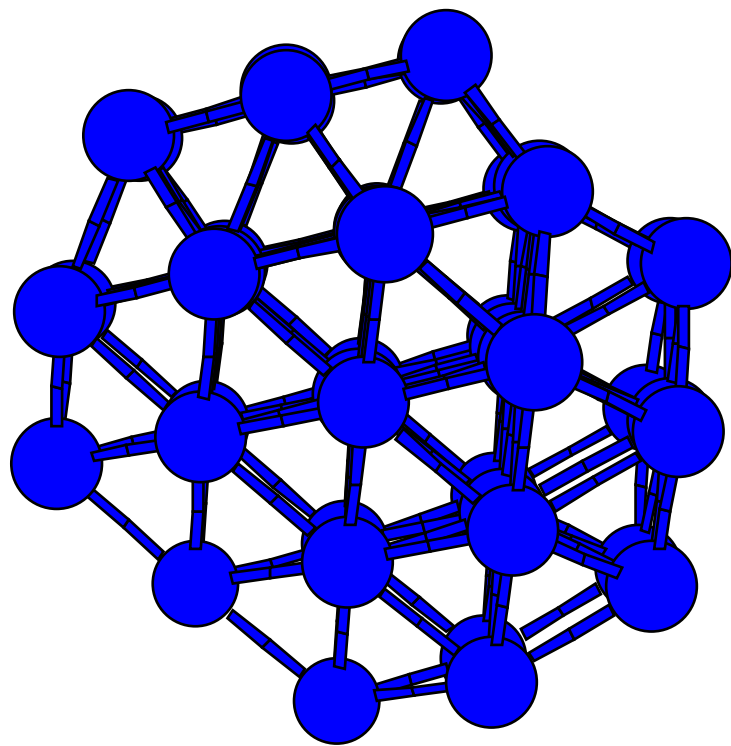

Supplement: pd45.pdf [file pd45.pdf]

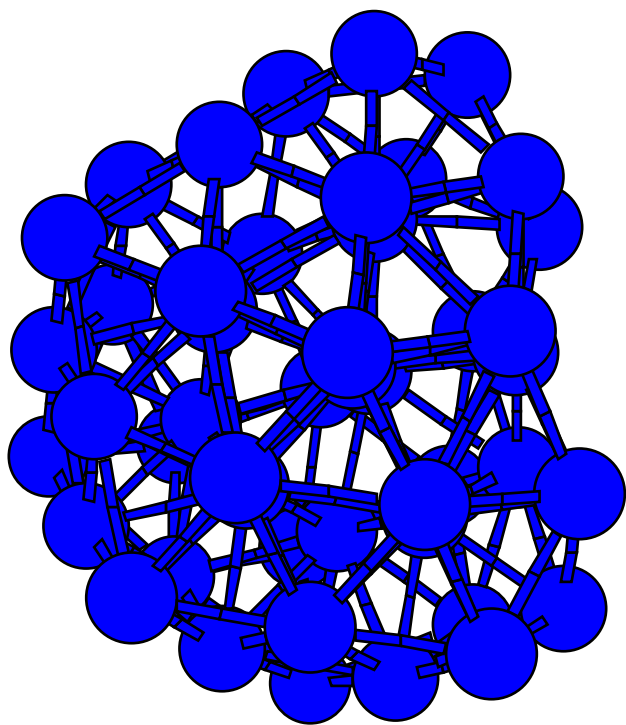

Supplement: pd46.pdf [file pd46.pdf]

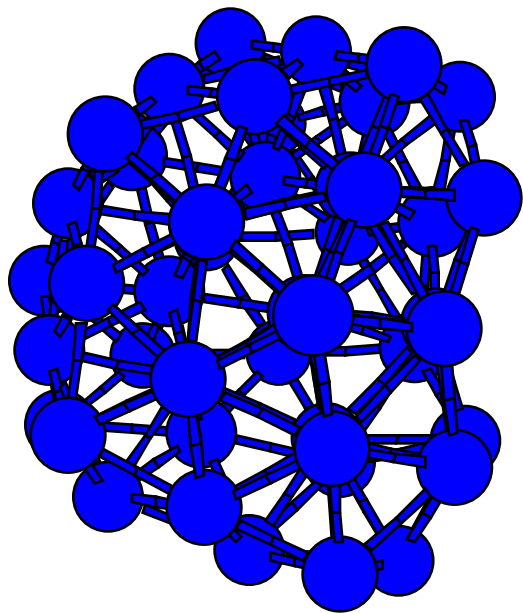

Supplement: pd47.pdf [file pd47.pdf]

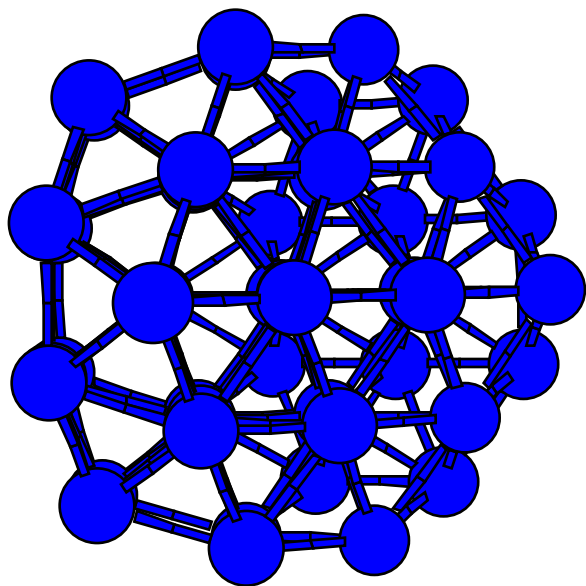

Supplement: pd48.pdf [file pd48.pdf]

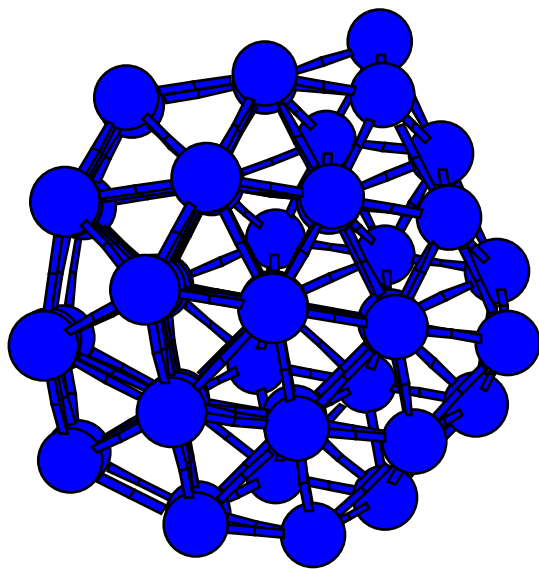

Supplement: pd49.pdf [file pd49.pdf]

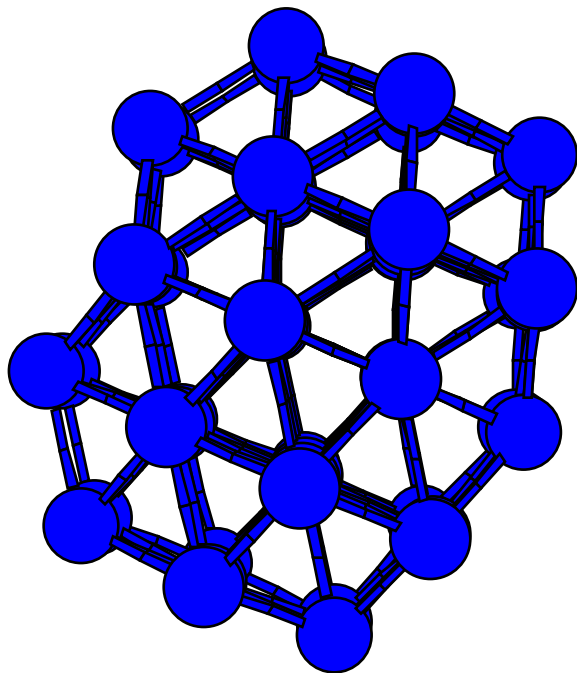

Supplement: pd50.pdf [file pd50.pdf]

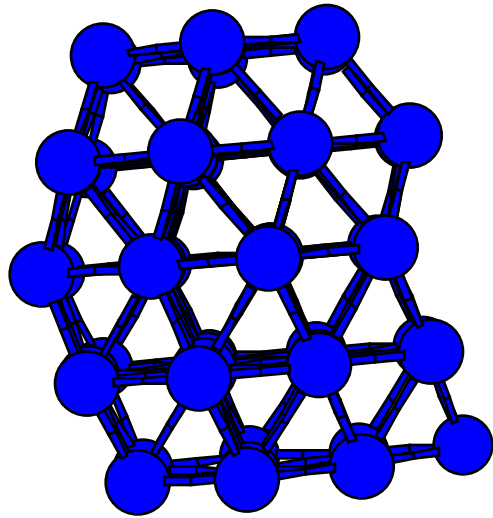

Supplement: pd51.pdf [file pd51.pdf]

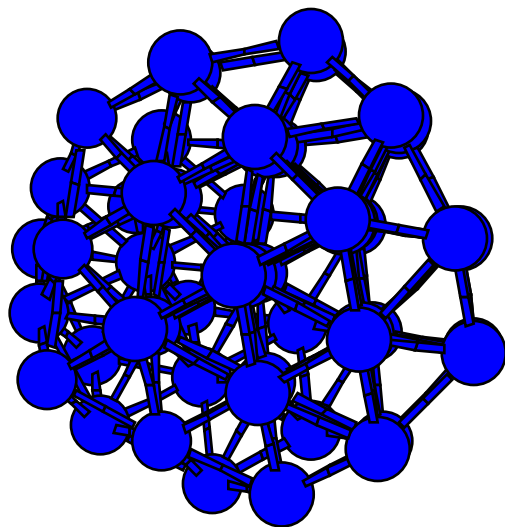

Supplement: pd52.pdf [file pd52.pdf]

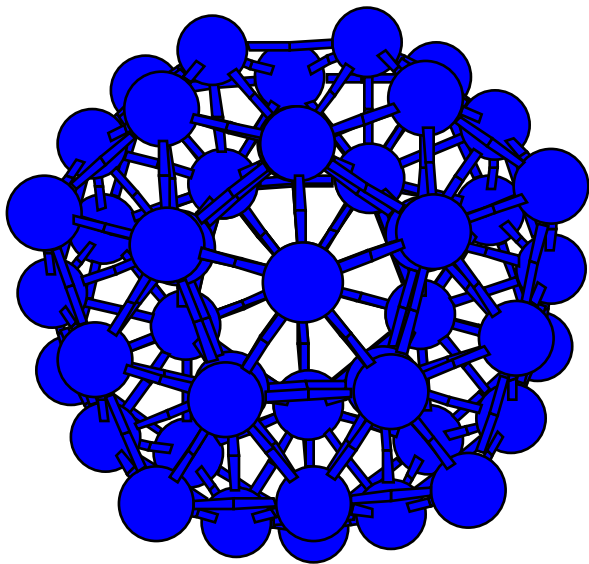

Supplement: pd53.pdf [file pd53.pdf]

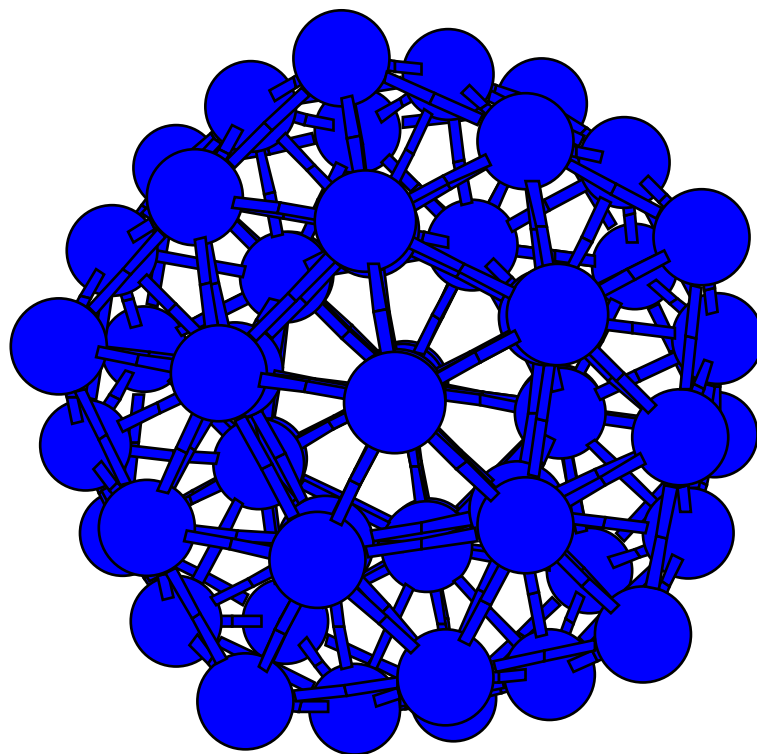

Supplement: pd54.pdf [file pd54.pdf]

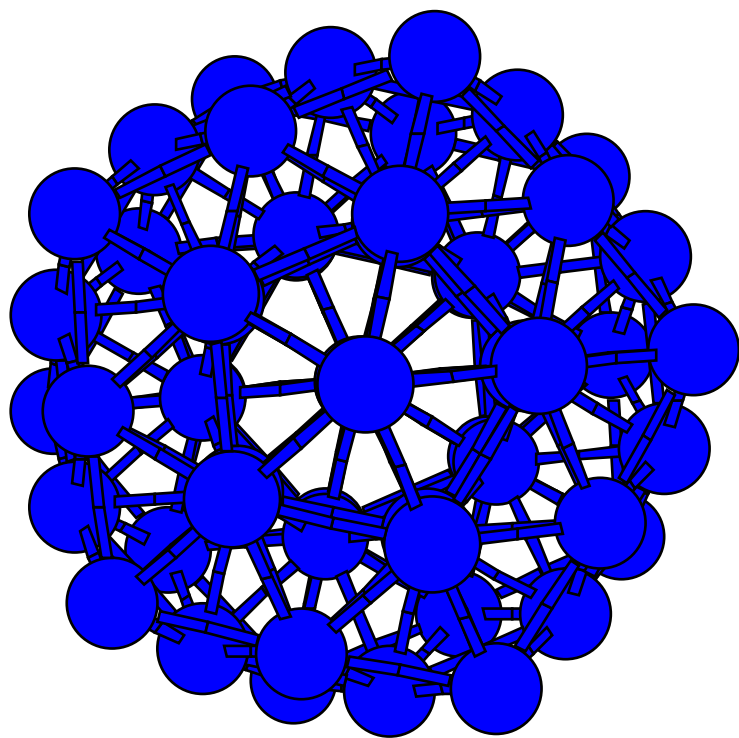

Supplement: pd55.pdf [file pd55.pdf]

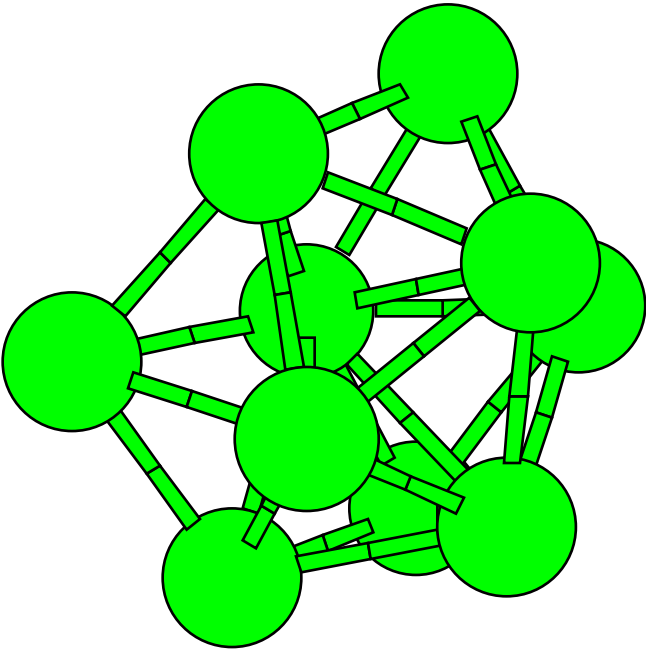

Supplement: pt10.pdf [file pt10.pdf]

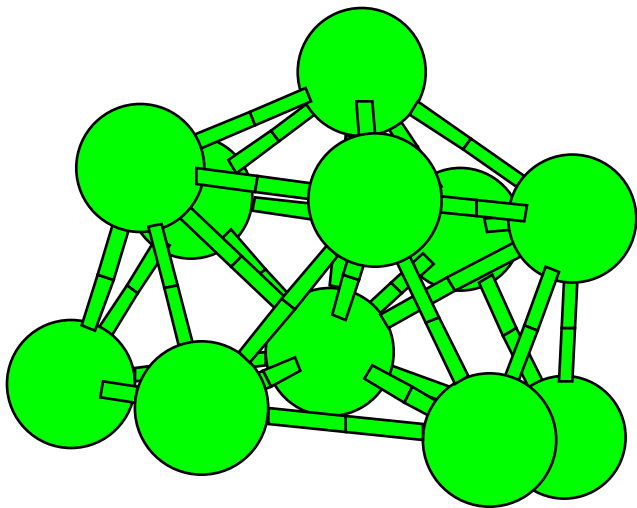

Supplement: pt11.pdf [file pt11.pdf]

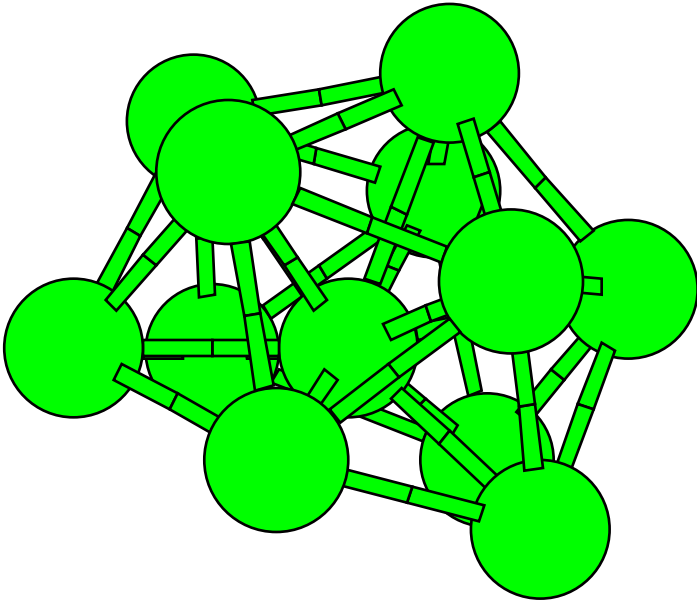

Supplement: pt12.pdf [file pt12.pdf]

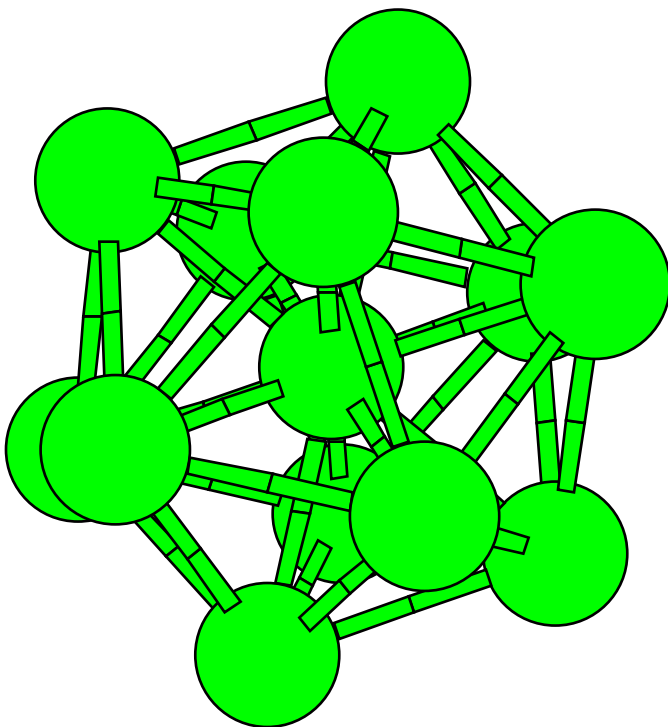

Supplement: pt13.pdf [file pt13.pdf]

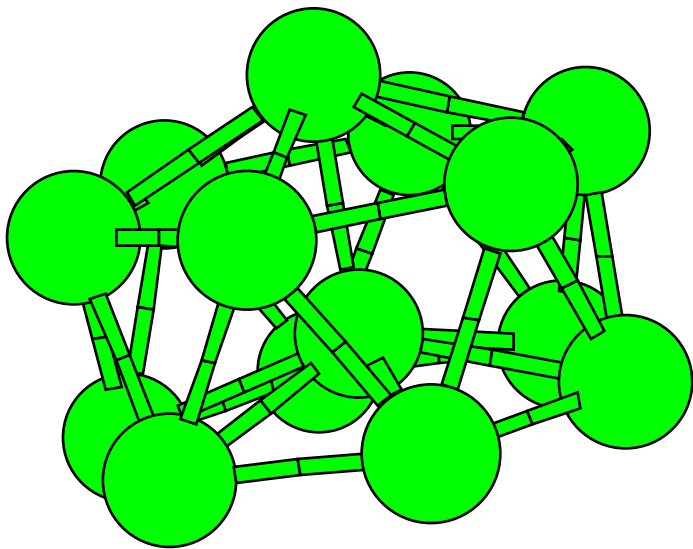

Supplement: pt14.pdf [file pt14.pdf]

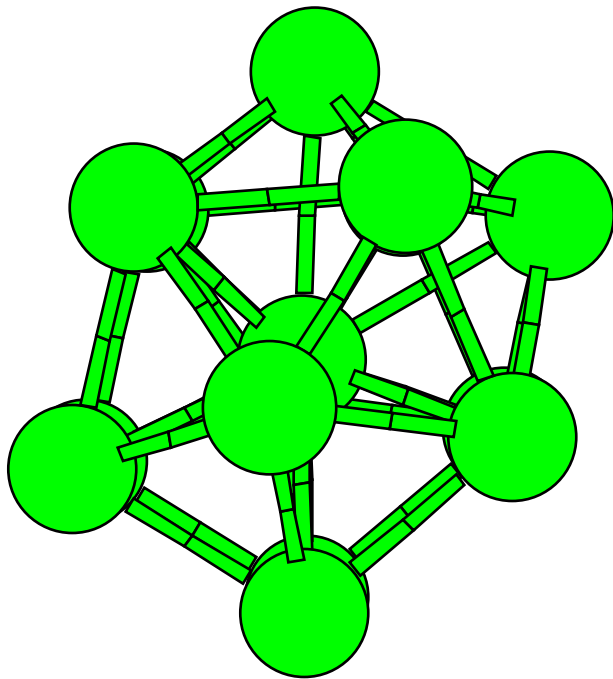

Supplement: pt15.pdf [file pt15.pdf]

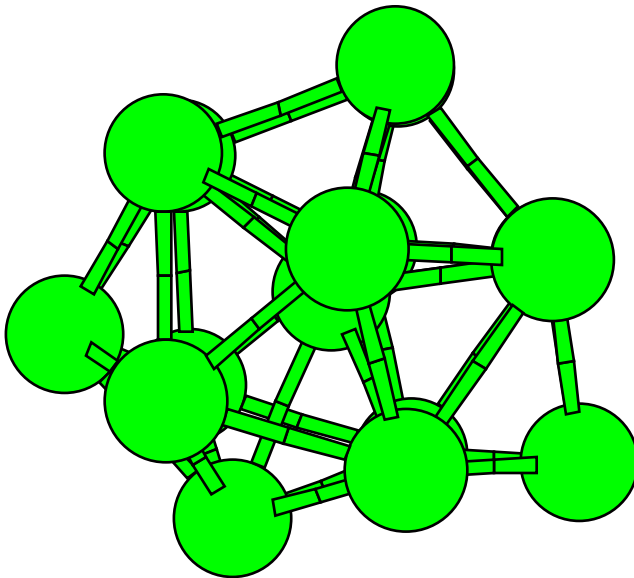

Supplement: pt16.pdf [file pt16.pdf]

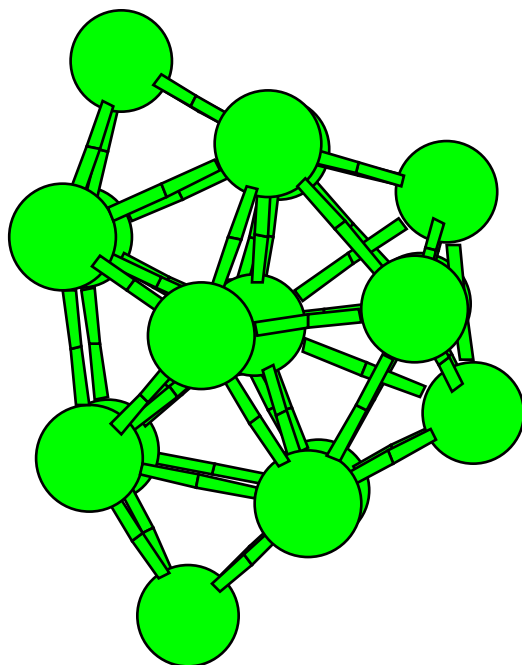

Supplement: pt17.pdf [file pt17.pdf]

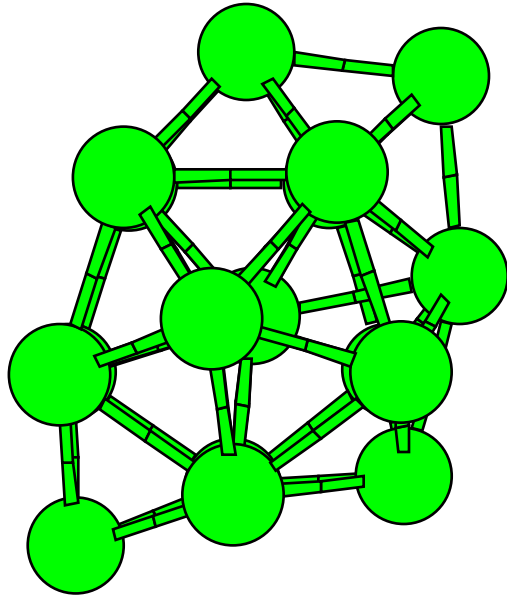

Supplement: pt18.pdf [file pt18.pdf]

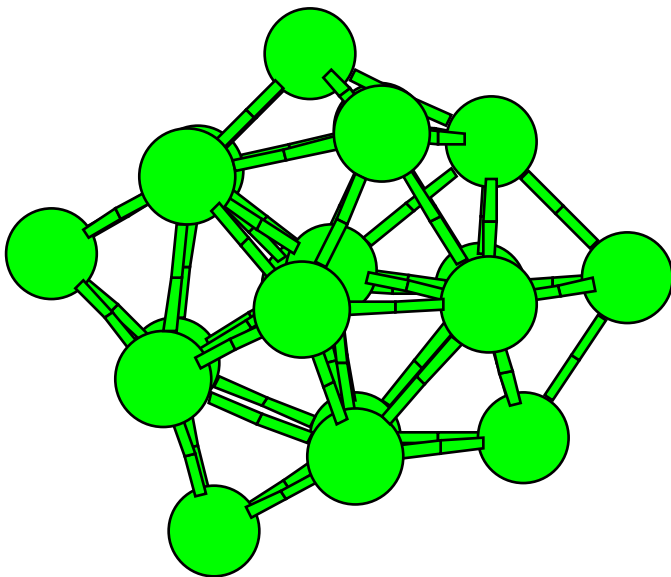

Supplement: pt19.pdf [file pt19.pdf]

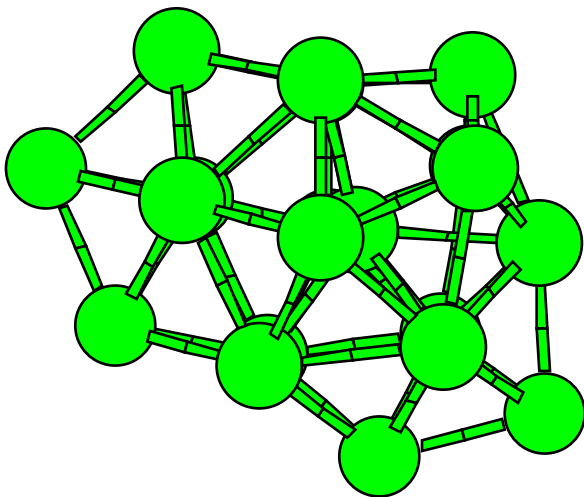

Supplement: pt20.pdf [file pt20.pdf]

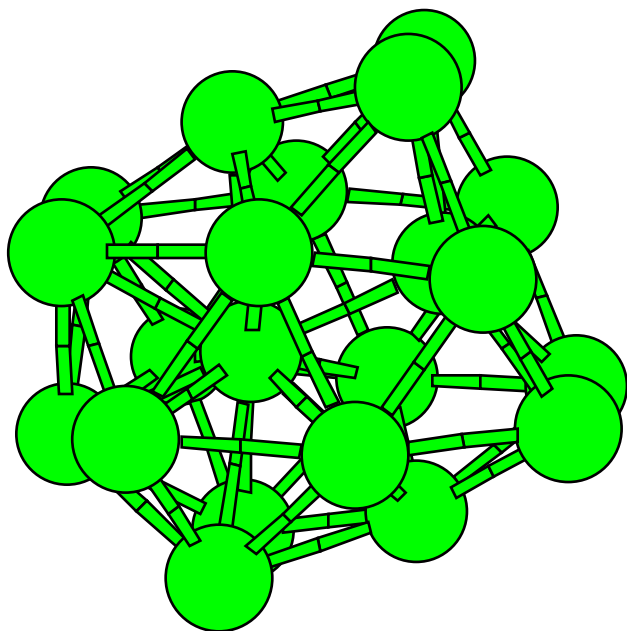

Supplement: pt21.pdf [file pt21.pdf]

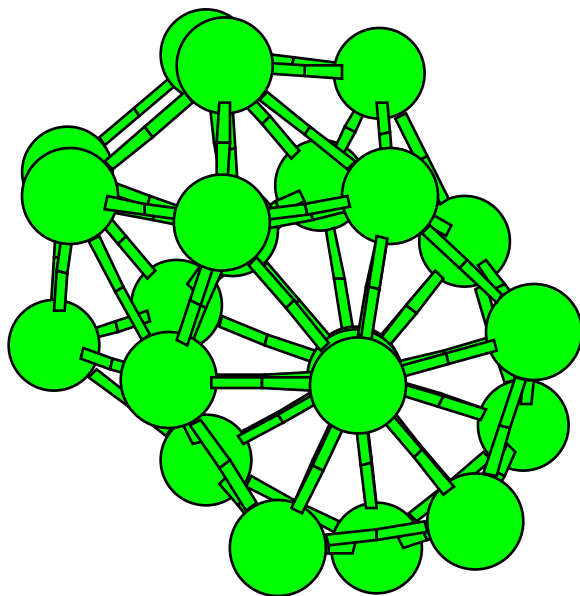

Supplement: pt22.pdf [file pt22.pdf]

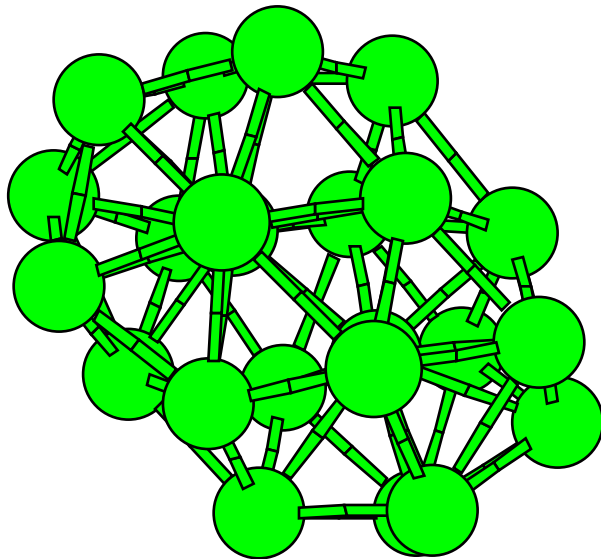

Supplement: pt23.pdf [file pt23.pdf]

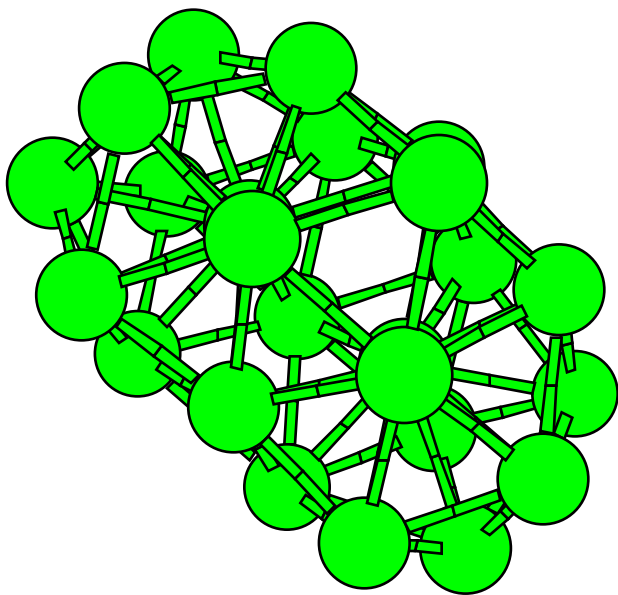

Supplement: pt24.pdf [file pt24.pdf]

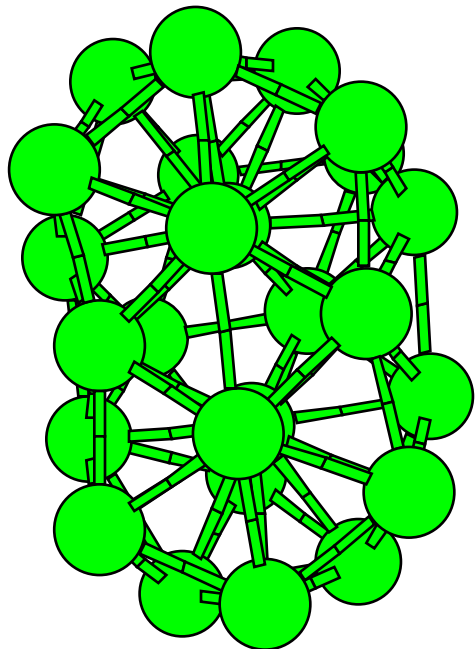

Supplement: pt25.pdf [file pt25.pdf]

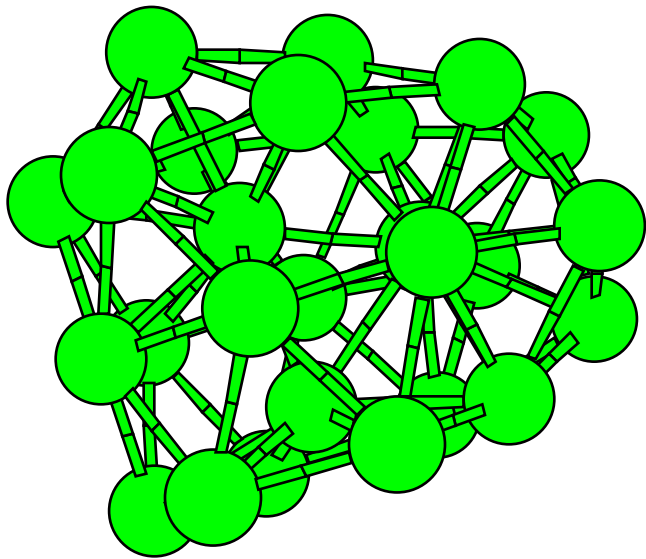

Supplement: pt26.pdf [file pt26.pdf]

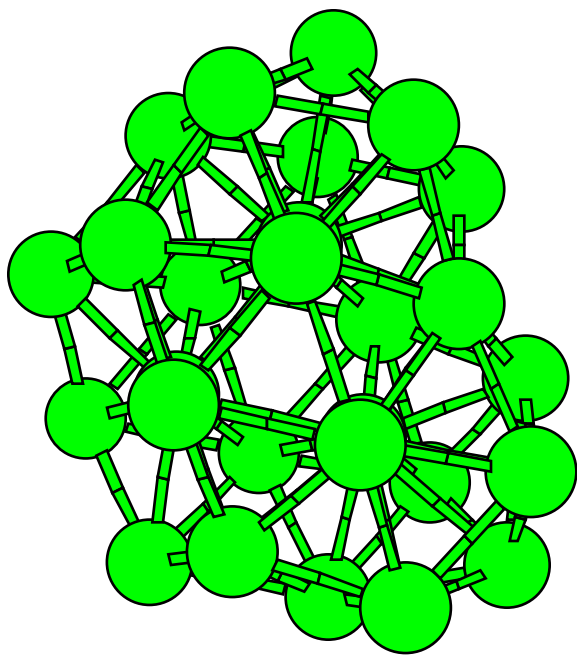

Supplement: pt27.pdf [file pt27.pdf]

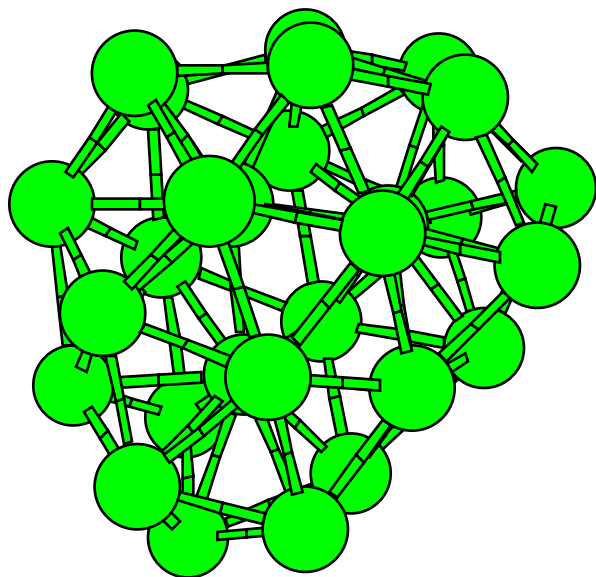

Supplement: pt28.pdf [file pt28.pdf]

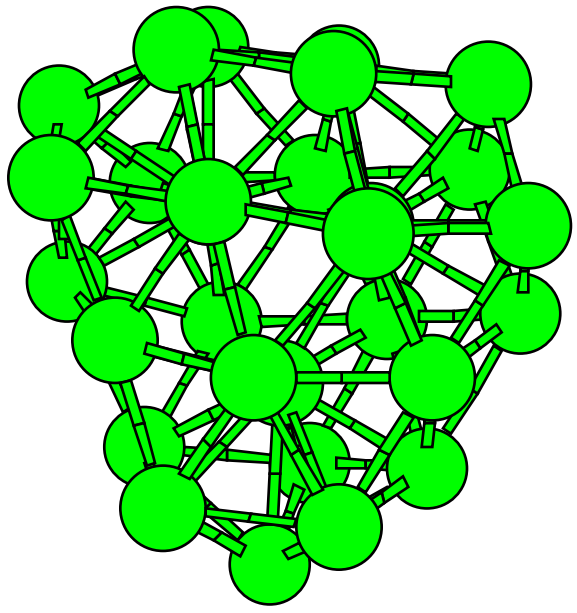

Supplement: pt29.pdf [file pt29.pdf]

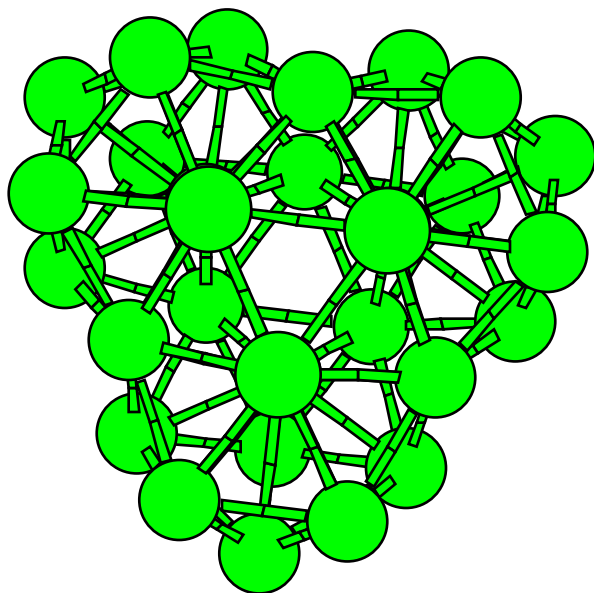

Supplement: pt30.pdf [file pt30.pdf]

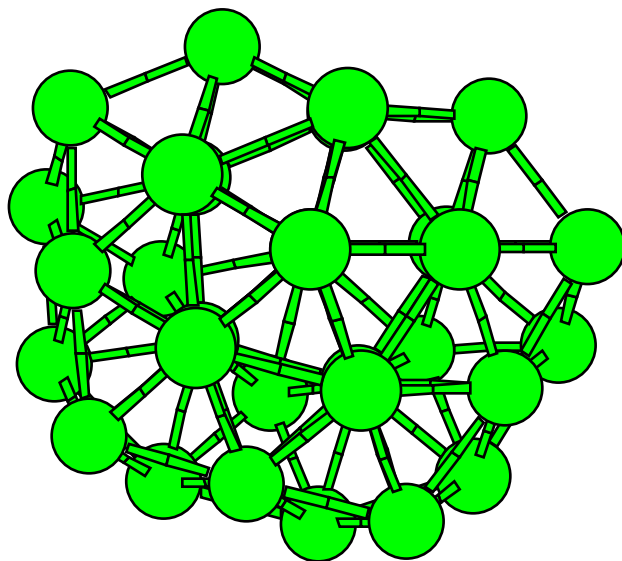

Supplement: pt31.pdf [file pt31.pdf]

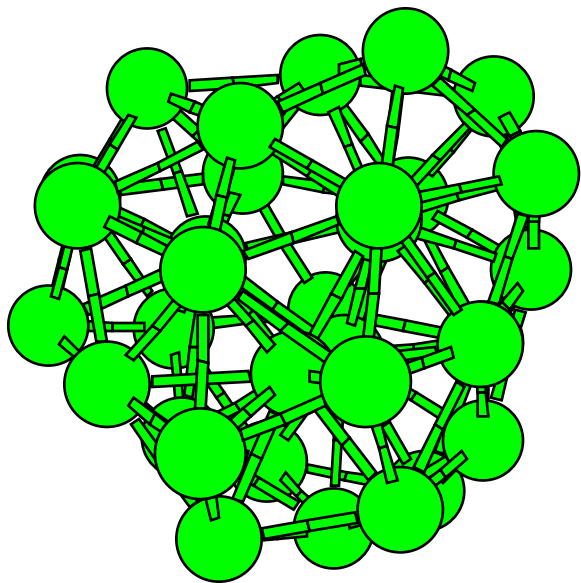

Supplement: pt32.pdf [file pt32.pdf]

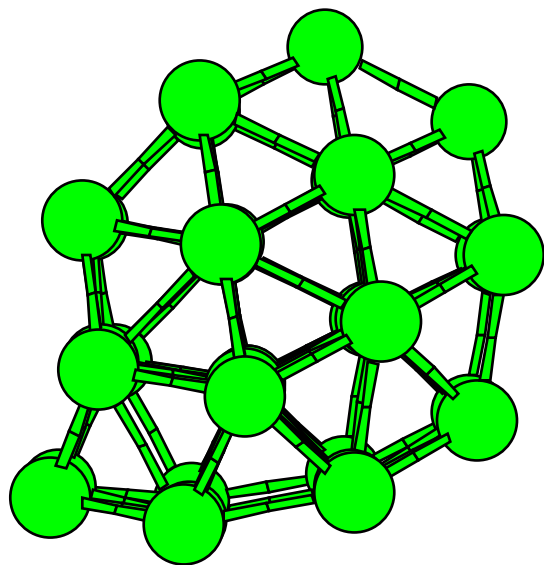

Supplement: pt33.pdf [file pt33.pdf]

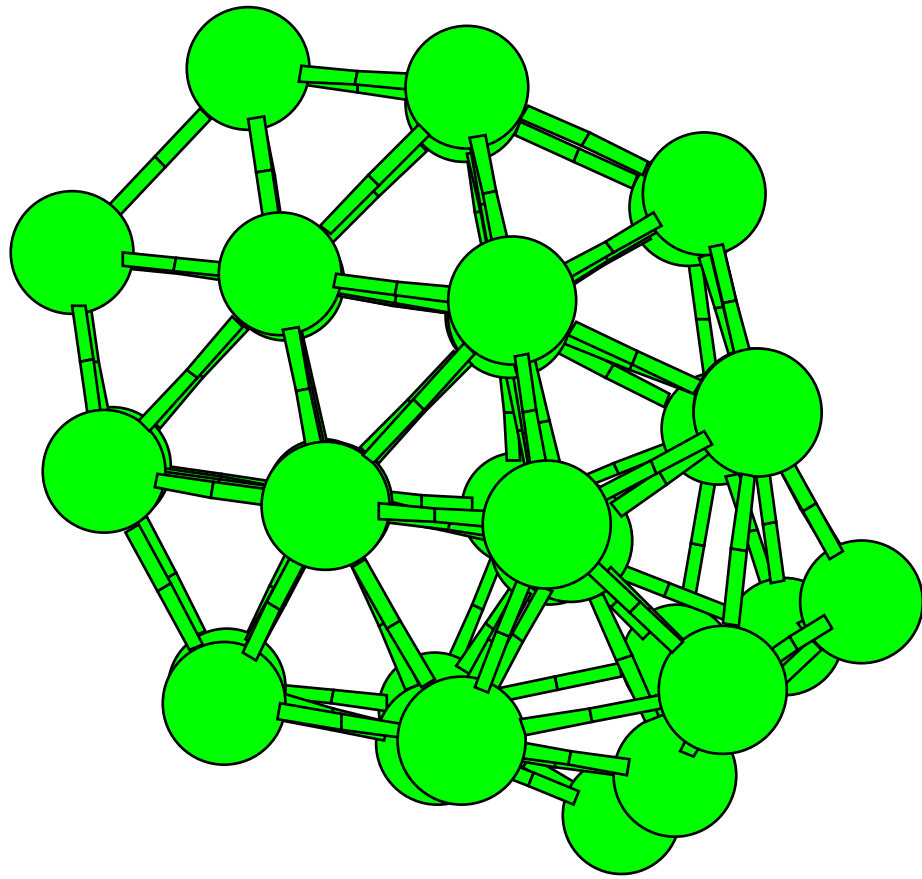

Supplement: pt34.pdf [file pt34.pdf]

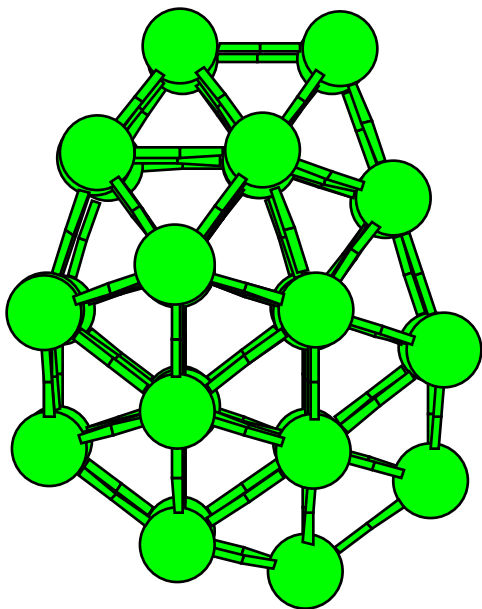

Supplement: pt35.pdf [file pt35.pdf]

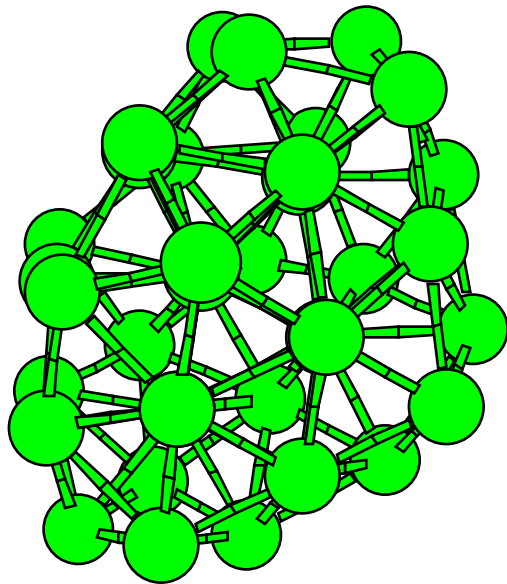

Supplement: pt36.pdf [file pt36.pdf]

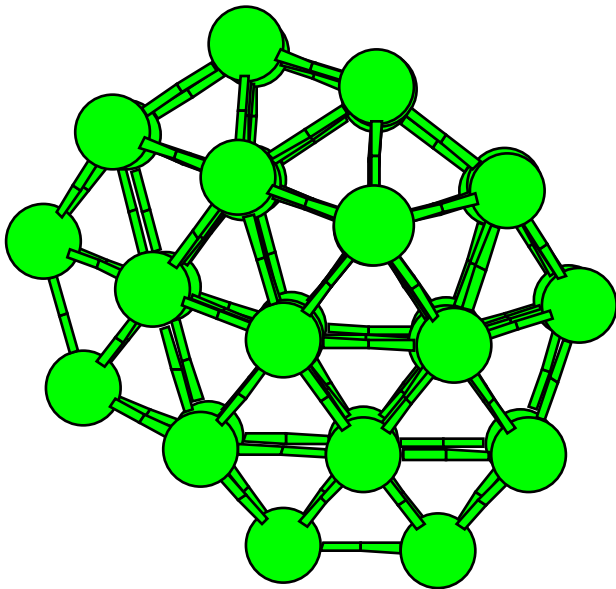

Supplement: pt37.pdf [file pt37.pdf]

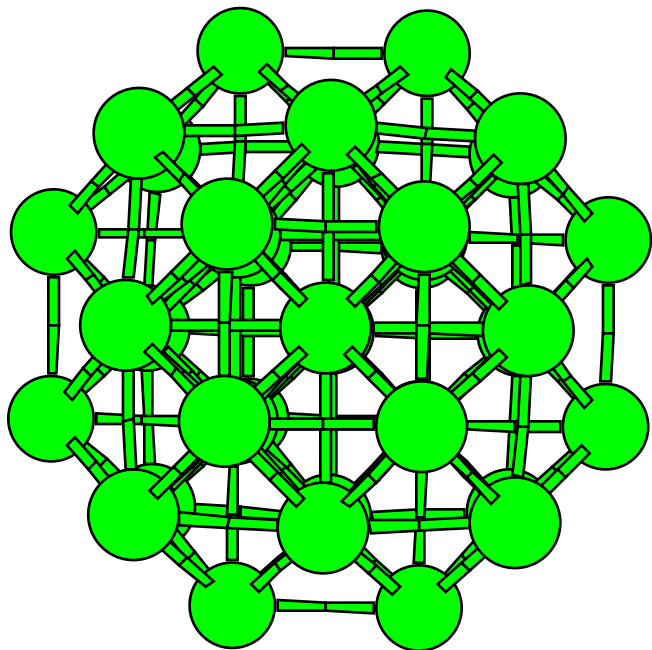

Supplement: pt38.pdf [file pt38.pdf]

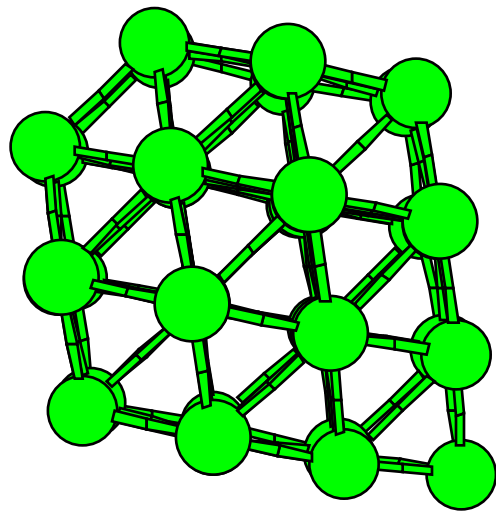

Supplement: pt39.pdf [file pt39.pdf]

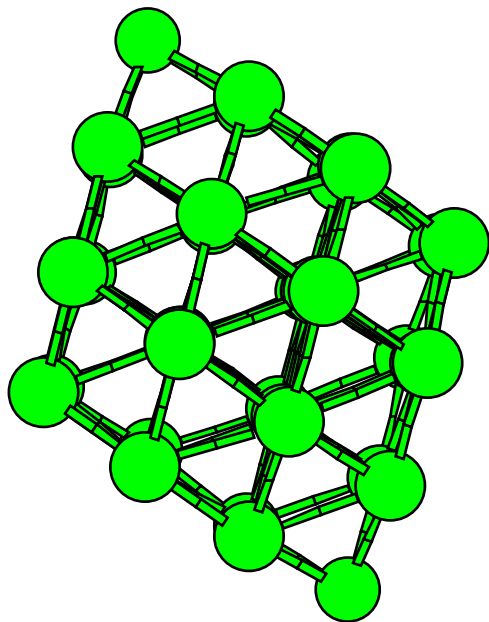

Supplement: pt40.pdf [file pt40.pdf]

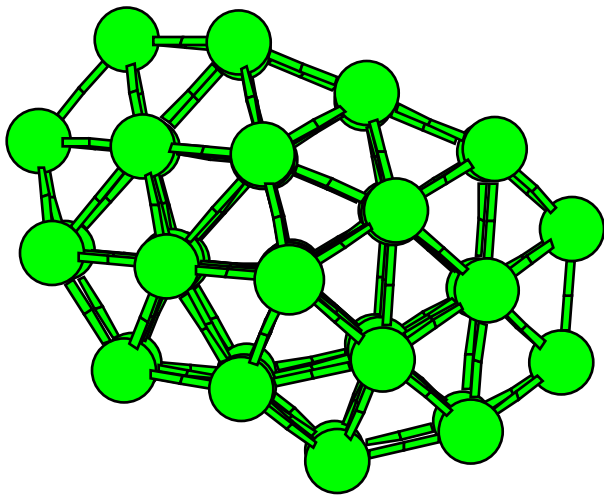

Supplement: pt41.pdf [file pt41.pdf]

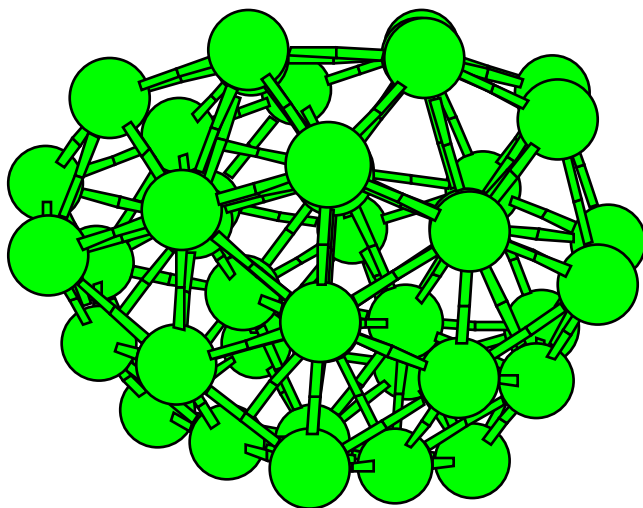

Supplement: pt42.pdf [file pt42.pdf]

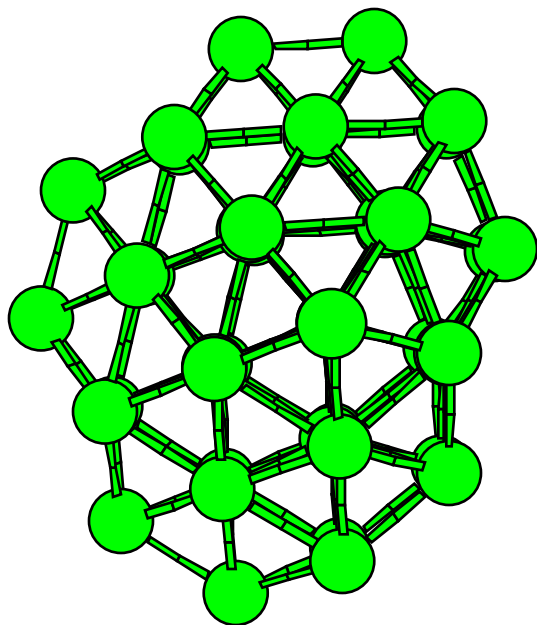

Supplement: pt43.pdf [file pt43.pdf]

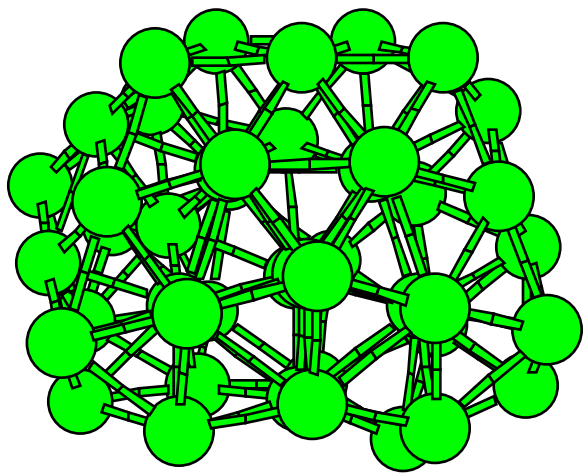

Supplement: pt44.pdf [file pt44.pdf]

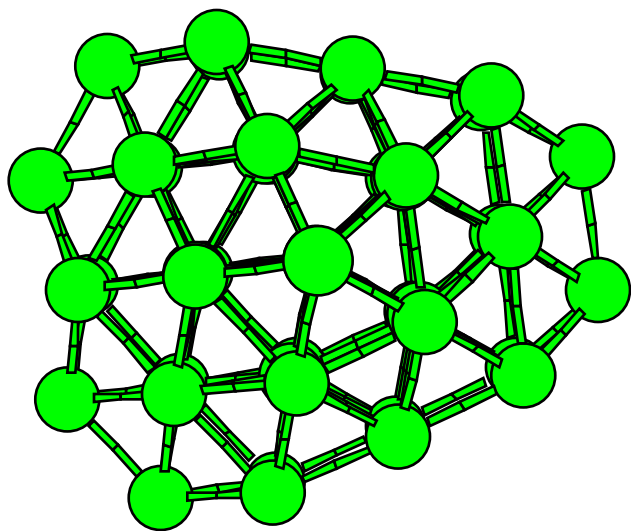

Supplement: pt45.pdf [file pt45.pdf]

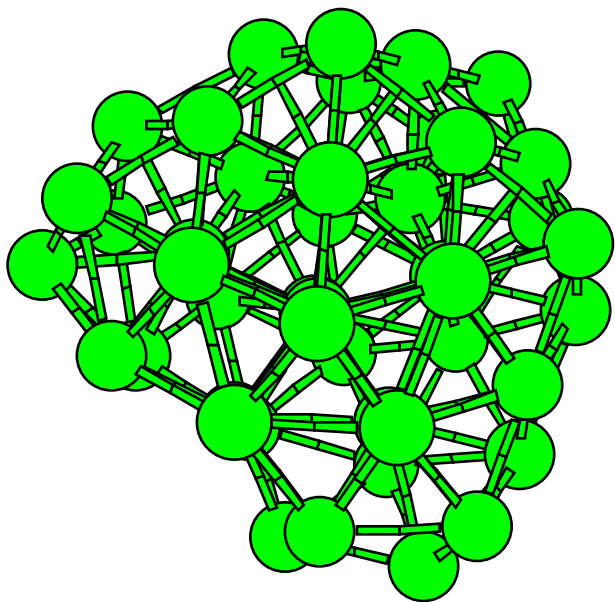

Supplement: pt46.pdf [file pt46.pdf]

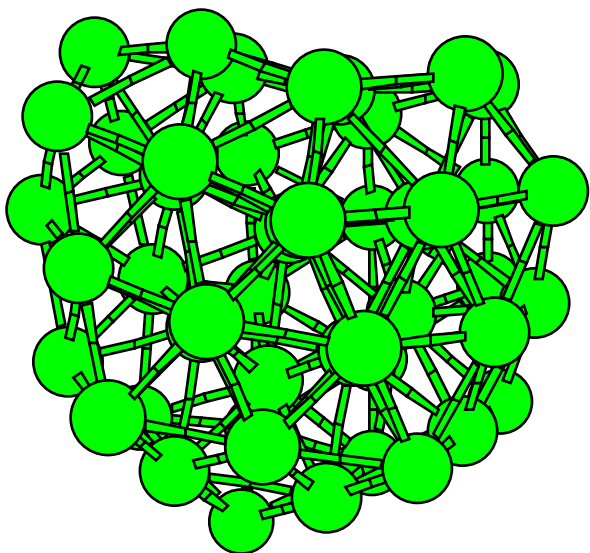

Supplement: pt47.pdf [file pt47.pdf]

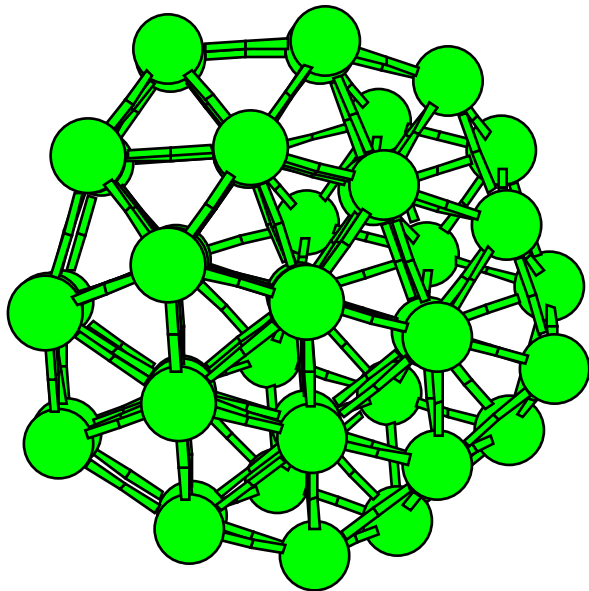

Supplement: pt48.pdf [file pt48.pdf]

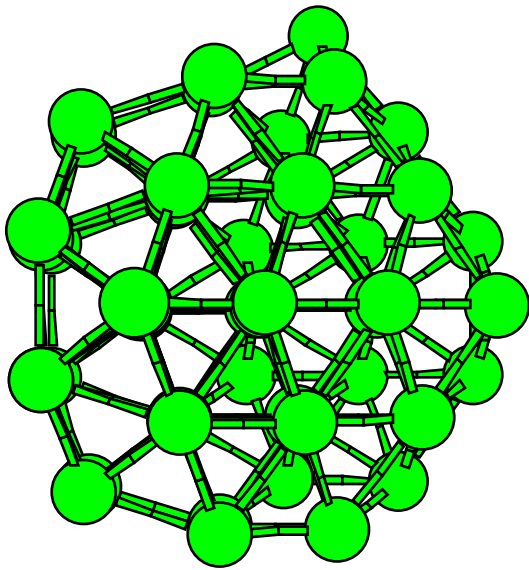

Supplement: pt49.pdf [file pt49.pdf]

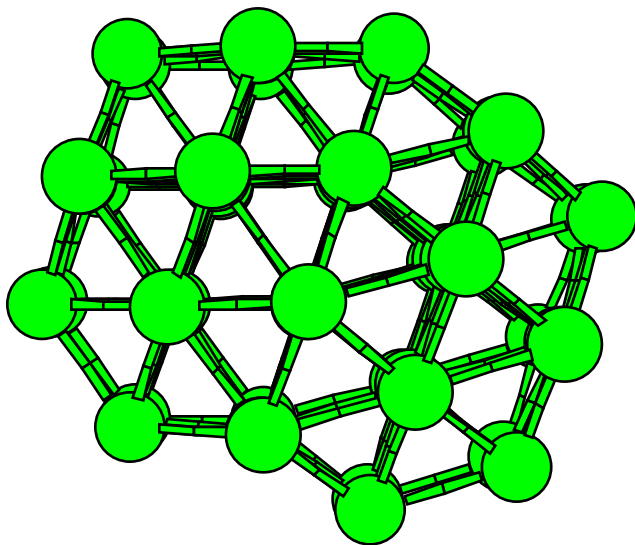

Supplement: pt50.pdf [file pt50.pdf]

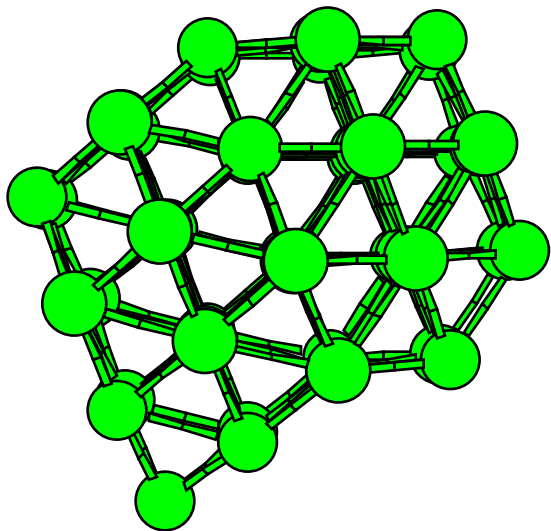

Supplement: pt51.pdf [file pt51.pdf]

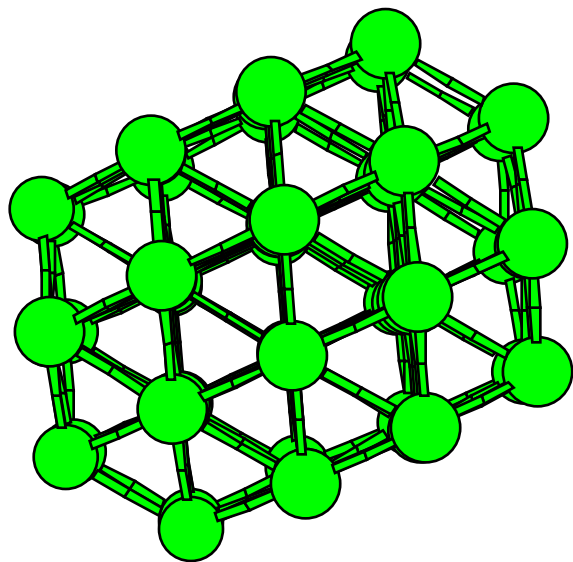

Supplement: pt52.pdf [file pt52.pdf]

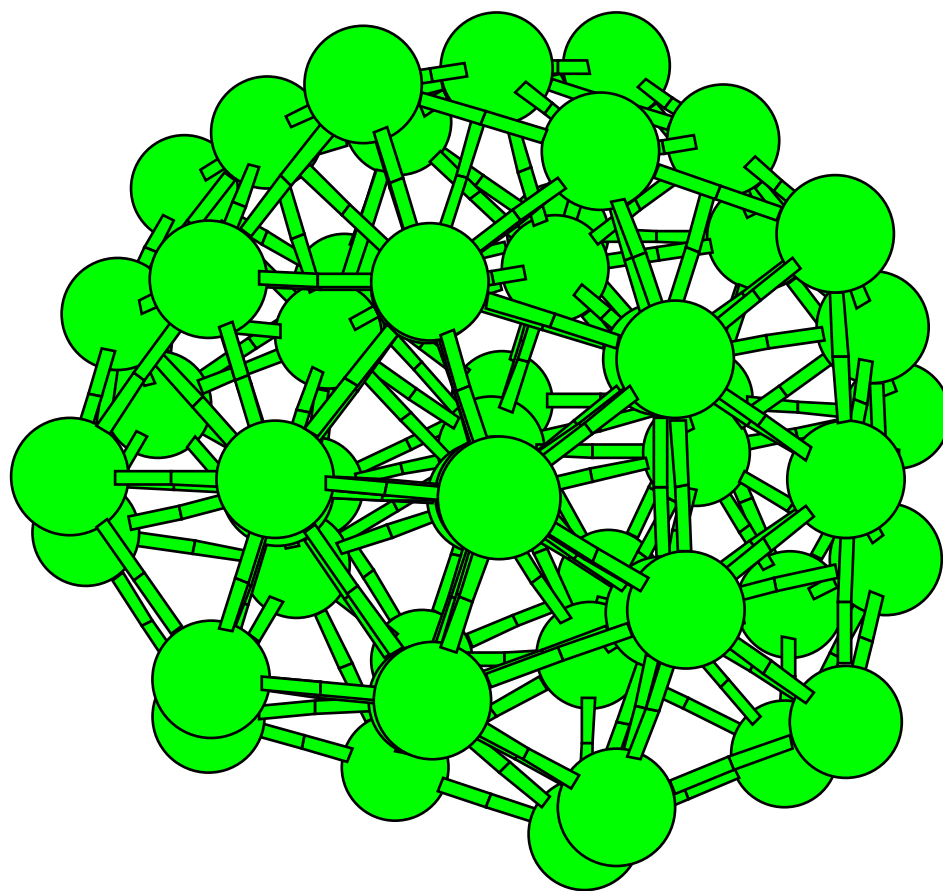

Supplement: pt53.pdf [file pt53.pdf]

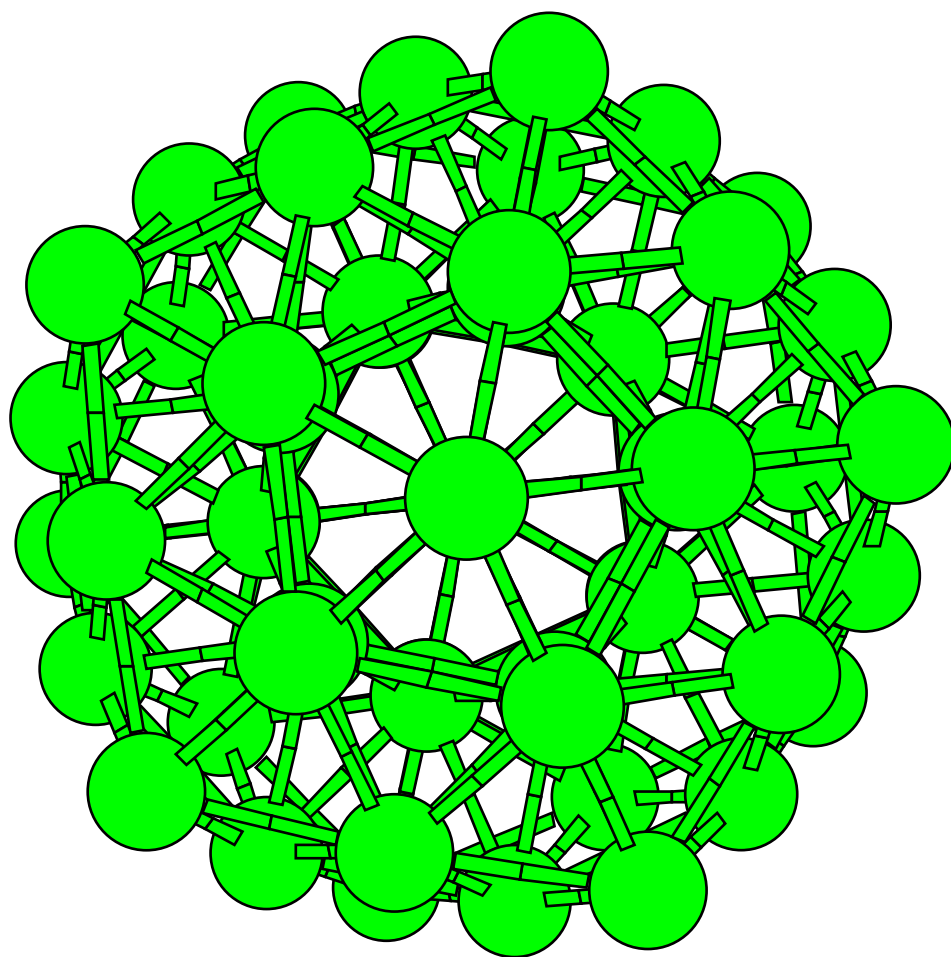

Supplement: pt54.pdf [file pt54.pdf]

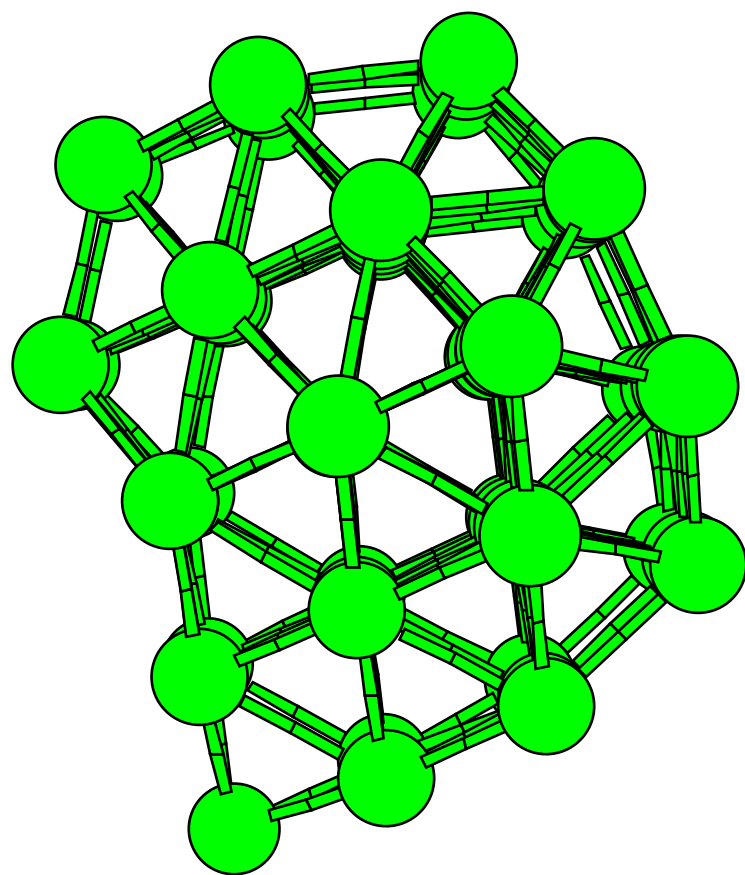

Supplement: pt55.pdf [file pt55.pdf]
